# Supplementary material for: Interdisciplinary optimism? Sentiment analysis of Twitter data
Source: R Soc Open Sci. 2019 Jul 31;6(7):190473. doi: 10.1098/rsos.190473 (PMC6689644; doi:10.1098/rsos.190473)
Supplement: Data S1 [file rsos190473supp1.csv]

TWEET_ID	TYPE	SENTIMENT	DATE
950513767955161088	interdisciplinary	neutral	2018-01-08 23:45:16
950513274772230145	interdisciplinary	positive	2018-01-08 23:43:19
950510183888822272	interdisciplinary	positive	2018-01-08 23:31:02
950507147972042752	interdisciplinary	neutral	2018-01-08 23:18:58
950505279292100608	interdisciplinary	positive	2018-01-08 23:11:32
950502420504702977	interdisciplinary	neutral	2018-01-08 23:00:11
950499960180518912	interdisciplinary	positive	2018-01-08 22:50:24
950496342723497984	interdisciplinary	neutral	2018-01-08 22:36:02
950492106430341121	interdisciplinary	neutral	2018-01-08 22:19:12
950490889247391745	interdisciplinary	neutral	2018-01-08 22:14:21
950484057330249729	interdisciplinary	neutral	2018-01-08 21:47:13
950476747736256517	interdisciplinary	positive	2018-01-08 21:18:10
950476212685672448	interdisciplinary	neutral	2018-01-08 21:16:02
950475796350717952	interdisciplinary	neutral	2018-01-08 21:14:23
950473329802186757	interdisciplinary	neutral	2018-01-08 21:04:35
950472673062203393	interdisciplinary	positive	2018-01-08 21:01:58
950466127670534147	interdisciplinary	positive	2018-01-08 20:35:58
950463999719690241	interdisciplinary	positive	2018-01-08 20:27:30
950461114583867392	interdisciplinary	positive	2018-01-08 20:16:03
950459839658057728	interdisciplinary	neutral	2018-01-08 20:10:59
950456722451247105	interdisciplinary	positive	2018-01-08 19:58:35
950456495732346885	interdisciplinary	neutral	2018-01-08 19:57:41
950452093881470976	interdisciplinary	neutral	2018-01-08 19:40:12
950451869549318144	interdisciplinary	neutral	2018-01-08 19:39:18
950450975248125954	interdisciplinary	neutral	2018-01-08 19:35:45
950450343858593793	interdisciplinary	positive	2018-01-08 19:33:15
950448015940243456	interdisciplinary	positive	2018-01-08 19:24:00
950442727493206017	interdisciplinary	neutral	2018-01-08 19:02:59
950439481831772161	interdisciplinary	neutral	2018-01-08 18:50:05
950438859388739585	interdisciplinary	neutral	2018-01-08 18:47:37
950438518932811776	interdisciplinary	neutral	2018-01-08 18:46:15
950436674512867329	interdisciplinary	neutral	2018-01-08 18:38:56
950436583257329664	interdisciplinary	neutral	2018-01-08 18:38:34
950434838997295104	interdisciplinary	neutral	2018-01-08 18:31:38
950434213194448896	interdisciplinary	neutral	2018-01-08 18:29:09
950431920483127297	interdisciplinary	positive	2018-01-08 18:20:02
950430759923470338	interdisciplinary	neutral	2018-01-08 18:15:25
950429975907356673	interdisciplinary	negative	2018-01-08 18:12:19
950429905535295489	interdisciplinary	neutral	2018-01-08 18:12:02
950429157699276802	interdisciplinary	positive	2018-01-08 18:09:03
950426104438906883	interdisciplinary	neutral	2018-01-08 17:56:56
950425823227600896	interdisciplinary	positive	2018-01-08 17:55:48
950424547039133696	interdisciplinary	negative	2018-01-08 17:50:44
950423770321178624	interdisciplinary	neutral	2018-01-08 17:47:39
950423592126242816	interdisciplinary	neutral	2018-01-08 17:46:57
950422875584061443	interdisciplinary	positive	2018-01-08 17:44:06
950421113875632128	interdisciplinary	neutral	2018-01-08 17:37:06
950418765317115906	interdisciplinary	positive	2018-01-08 17:27:46
950415531827347457	interdisciplinary	positive	2018-01-08 17:14:55
950415000056815616	interdisciplinary	positive	2018-01-08 17:12:48
950414958013112320	interdisciplinary	neutral	2018-01-08 17:12:38
950412951344877569	interdisciplinary	neutral	2018-01-08 17:04:40
950411778541924354	interdisciplinary	positive	2018-01-08 17:00:00
950410627230588928	interdisciplinary	neutral	2018-01-08 16:55:25
950408480875274240	interdisciplinary	neutral	2018-01-08 16:46:54
950404235958669312	interdisciplinary	neutral	2018-01-08 16:30:02
950402834167681024	interdisciplinary	positive	2018-01-08 16:24:27
950401757791866880	interdisciplinary	positive	2018-01-08 16:20:11
950401708873736193	interdisciplinary	neutral	2018-01-08 16:19:59
950400454378209281	interdisciplinary	neutral	2018-01-08 16:15:00
950397340438818816	interdisciplinary	neutral	2018-01-08 16:02:38
950396424771923968	interdisciplinary	neutral	2018-01-08 15:58:59
950396143610953730	interdisciplinary	neutral	2018-01-08 15:57:52
950393070377422850	interdisciplinary	neutral	2018-01-08 15:45:40
950392160012075008	interdisciplinary	neutral	2018-01-08 15:42:03
950390555720208384	interdisciplinary	neutral	2018-01-08 15:35:40
950387901044609024	interdisciplinary	neutral	2018-01-08 15:25:07
950386378902245376	interdisciplinary	positive	2018-01-08 15:19:04
950384006008328192	interdisciplinary	neutral	2018-01-08 15:09:38
950383089565433856	interdisciplinary	neutral	2018-01-08 15:06:00
950382444401909760	interdisciplinary	neutral	2018-01-08 15:03:26
950381514855997440	interdisciplinary	neutral	2018-01-08 14:59:45
950380647436169217	interdisciplinary	neutral	2018-01-08 14:56:18
950379802527260673	interdisciplinary	neutral	2018-01-08 14:52:56
950379684637720577	interdisciplinary	neutral	2018-01-08 14:52:28
950379442370588672	interdisciplinary	neutral	2018-01-08 14:51:30
950376488498532353	interdisciplinary	positive	2018-01-08 14:39:46
950375241208999936	interdisciplinary	neutral	2018-01-08 14:34:49
950375109394681857	interdisciplinary	neutral	2018-01-08 14:34:17
950372955548213249	interdisciplinary	neutral	2018-01-08 14:25:44
950371549030309893	interdisciplinary	positive	2018-01-08 14:20:08
950371008778833921	interdisciplinary	neutral	2018-01-08 14:18:00
950370904739115009	interdisciplinary	neutral	2018-01-08 14:17:35
950370346879897600	interdisciplinary	neutral	2018-01-08 14:15:22
950368498550759424	interdisciplinary	positive	2018-01-08 14:08:01
950366840215261184	interdisciplinary	negative	2018-01-08 14:01:26
950364394365620229	interdisciplinary	neutral	2018-01-08 13:51:43
950360031698055171	interdisciplinary	neutral	2018-01-08 13:34:23
950357468277805057	interdisciplinary	neutral	2018-01-08 13:24:11
950354696505569280	interdisciplinary	positive	2018-01-08 13:13:11
950352888106225666	interdisciplinary	neutral	2018-01-08 13:05:59
950350315869569025	interdisciplinary	positive	2018-01-08 12:55:46
950348632489889792	interdisciplinary	positive	2018-01-08 12:49:05
950348246915928064	interdisciplinary	positive	2018-01-08 12:47:33
950347915167436801	interdisciplinary	neutral	2018-01-08 12:46:14
950347605191491584	interdisciplinary	neutral	2018-01-08 12:45:00
950344416648224770	interdisciplinary	neutral	2018-01-08 12:32:20
950340639706763264	interdisciplinary	neutral	2018-01-08 12:17:19
950331887796588545	interdisciplinary	positive	2018-01-08 11:42:33
950331247351517184	interdisciplinary	positive	2018-01-08 11:40:00
950328833806397440	interdisciplinary	neutral	2018-01-08 11:30:24
950328468700651521	interdisciplinary	neutral	2018-01-08 11:28:57
950323387523575808	interdisciplinary	neutral	2018-01-08 11:08:46
950319155370217473	interdisciplinary	negative	2018-01-08 10:51:57
950318536244781056	interdisciplinary	positive	2018-01-08 10:49:29
950313424063483904	interdisciplinary	neutral	2018-01-08 10:29:10
950312403555758081	interdisciplinary	neutral	2018-01-08 10:25:07
950310675200593920	interdisciplinary	positive	2018-01-08 10:18:15
950309506587725825	interdisciplinary	positive	2018-01-08 10:13:36
950308869460373505	interdisciplinary	positive	2018-01-08 10:11:05
950296807300624384	interdisciplinary	neutral	2018-01-08 09:23:09
950296257670647809	interdisciplinary	neutral	2018-01-08 09:20:58
950294292525912069	interdisciplinary	negative	2018-01-08 09:13:09
950293879684763648	interdisciplinary	neutral	2018-01-08 09:11:31
950289613456896000	interdisciplinary	neutral	2018-01-08 08:54:34
950287801035186176	interdisciplinary	positive	2018-01-08 08:47:21
950283432906588160	interdisciplinary	neutral	2018-01-08 08:30:00
950281506768982016	interdisciplinary	positive	2018-01-08 08:22:21
950274673656279041	interdisciplinary	neutral	2018-01-08 07:55:12
950270097230323712	interdisciplinary	neutral	2018-01-08 07:37:01
950267864354877440	interdisciplinary	neutral	2018-01-08 07:28:08
950259901649096704	interdisciplinary	negative	2018-01-08 06:56:30
950258837105278976	interdisciplinary	neutral	2018-01-08 06:52:16
950255759828373511	interdisciplinary	positive	2018-01-08 06:40:02
950225758127120384	interdisciplinary	negative	2018-01-08 04:40:49
950208249239715841	interdisciplinary	neutral	2018-01-08 03:31:15
950190945319956480	interdisciplinary	positive	2018-01-08 02:22:29
950185691727540224	interdisciplinary	positive	2018-01-08 02:01:37
950174990963376128	interdisciplinary	neutral	2018-01-08 01:19:05
950173507610169345	interdisciplinary	positive	2018-01-08 01:13:12
950170268923826177	interdisciplinary	neutral	2018-01-08 01:00:20
950165188833107973	interdisciplinary	neutral	2018-01-08 00:40:08
950160000927674368	interdisciplinary	positive	2018-01-08 00:19:31
950157855293825024	interdisciplinary	neutral	2018-01-08 00:11:00
950156857724649472	interdisciplinary	neutral	2018-01-08 00:07:02
910529828771762177	interdisciplinary	neutral	2017-09-20 15:43:22
910528697312178176	interdisciplinary	positive	2017-09-20 15:38:52
910526231895875585	interdisciplinary	neutral	2017-09-20 15:29:05
910526163432493057	interdisciplinary	positive	2017-09-20 15:28:48
910523974299222017	interdisciplinary	positive	2017-09-20 15:20:06
910519502160449536	interdisciplinary	neutral	2017-09-20 15:02:20
910519240586813440	interdisciplinary	positive	2017-09-20 15:01:18
910518923250094080	interdisciplinary	neutral	2017-09-20 15:00:02
910517578853953536	interdisciplinary	neutral	2017-09-20 14:54:42
910517487816540160	interdisciplinary	neutral	2017-09-20 14:54:20
910517224330481664	interdisciplinary	positive	2017-09-20 14:53:17
910516653586251776	interdisciplinary	positive	2017-09-20 14:51:01
910515405084516352	interdisciplinary	neutral	2017-09-20 14:46:03
910513500124073985	interdisciplinary	neutral	2017-09-20 14:38:29
910512454123311104	interdisciplinary	positive	2017-09-20 14:34:20
910510133184221186	interdisciplinary	neutral	2017-09-20 14:25:06
910509934990823426	interdisciplinary	neutral	2017-09-20 14:24:19
910509185120505857	interdisciplinary	neutral	2017-09-20 14:21:20
910508696882630656	interdisciplinary	neutral	2017-09-20 14:19:24
910507204524101633	interdisciplinary	neutral	2017-09-20 14:13:28
910505141119406080	interdisciplinary	neutral	2017-09-20 14:05:16
910503847172333568	interdisciplinary	positive	2017-09-20 14:00:08
910502784570679296	interdisciplinary	neutral	2017-09-20 13:55:54
910502189503741952	interdisciplinary	positive	2017-09-20 13:53:32
910500671916560384	interdisciplinary	positive	2017-09-20 13:47:31
910498655555260417	interdisciplinary	positive	2017-09-20 13:39:30
910498482296954881	interdisciplinary	neutral	2017-09-20 13:38:49
910498463187652608	interdisciplinary	neutral	2017-09-20 13:38:44
910498442518106112	interdisciplinary	neutral	2017-09-20 13:38:39
910498301031612417	interdisciplinary	positive	2017-09-20 13:38:05
910489977204756480	interdisciplinary	positive	2017-09-20 13:05:01
910487297300271105	interdisciplinary	neutral	2017-09-20 12:54:22
910482657875808257	interdisciplinary	neutral	2017-09-20 12:35:56
910482216848945152	interdisciplinary	neutral	2017-09-20 12:34:11
910481171812950016	interdisciplinary	positive	2017-09-20 12:30:01
910479010748084224	interdisciplinary	neutral	2017-09-20 12:21:26
910474692070219776	interdisciplinary	neutral	2017-09-20 12:04:17
910474264268214274	interdisciplinary	positive	2017-09-20 12:02:35
910473431040364545	interdisciplinary	neutral	2017-09-20 11:59:16
910472018293862400	interdisciplinary	neutral	2017-09-20 11:53:39
910470578624188417	interdisciplinary	neutral	2017-09-20 11:47:56
910468747827322880	interdisciplinary	neutral	2017-09-20 11:40:39
910467276624850944	interdisciplinary	neutral	2017-09-20 11:34:49
910462956609163266	interdisciplinary	neutral	2017-09-20 11:17:39
910462367242342400	interdisciplinary	positive	2017-09-20 11:15:18
910461913926176768	interdisciplinary	neutral	2017-09-20 11:13:30
910461072582303745	interdisciplinary	neutral	2017-09-20 11:10:09
910455936833216513	interdisciplinary	positive	2017-09-20 10:49:45
910455930055266304	interdisciplinary	neutral	2017-09-20 10:49:43
910451140793438208	interdisciplinary	neutral	2017-09-20 10:30:41
910444889355284486	interdisciplinary	positive	2017-09-20 10:05:51
910443430072942593	interdisciplinary	neutral	2017-09-20 10:00:03
910442551479558145	interdisciplinary	positive	2017-09-20 09:56:34
910440425848279041	interdisciplinary	neutral	2017-09-20 09:48:07
910438515757993984	interdisciplinary	positive	2017-09-20 09:40:31
910438394420879362	interdisciplinary	neutral	2017-09-20 09:40:03
910437450018902017	interdisciplinary	neutral	2017-09-20 09:36:17
910437428476960770	interdisciplinary	positive	2017-09-20 09:36:12
910428580261367808	interdisciplinary	neutral	2017-09-20 09:01:03
910428067277000704	interdisciplinary	neutral	2017-09-20 08:59:00
910427546956726272	interdisciplinary	neutral	2017-09-20 08:56:56
910427041685757952	interdisciplinary	neutral	2017-09-20 08:54:56
910426776786137088	interdisciplinary	neutral	2017-09-20 08:53:53
910426254721081345	interdisciplinary	neutral	2017-09-20 08:51:48
910425353713315840	interdisciplinary	neutral	2017-09-20 08:48:13
910424301173723136	interdisciplinary	negative	2017-09-20 08:44:02
910424258689429506	interdisciplinary	neutral	2017-09-20 08:43:52
910423186696806400	interdisciplinary	neutral	2017-09-20 08:39:37
910422466966835200	interdisciplinary	neutral	2017-09-20 08:36:45
910421685647659009	interdisciplinary	neutral	2017-09-20 08:33:39
910420666784075777	interdisciplinary	neutral	2017-09-20 08:29:36
910415075554422784	interdisciplinary	positive	2017-09-20 08:07:23
910412583789772800	interdisciplinary	neutral	2017-09-20 07:57:29
910401205284872192	interdisciplinary	neutral	2017-09-20 07:12:16
910400810210689024	interdisciplinary	positive	2017-09-20 07:10:42
910399282083016704	interdisciplinary	positive	2017-09-20 07:04:37
910392163434995712	interdisciplinary	neutral	2017-09-20 06:36:20
910391030188404736	interdisciplinary	neutral	2017-09-20 06:31:50
910388582669586433	interdisciplinary	neutral	2017-09-20 06:22:06
910385444348719104	interdisciplinary	positive	2017-09-20 06:09:38
910375162620645377	interdisciplinary	neutral	2017-09-20 05:28:47
910364789129584641	interdisciplinary	positive	2017-09-20 04:47:34
910360631471112192	interdisciplinary	neutral	2017-09-20 04:31:02
910351622764683265	interdisciplinary	neutral	2017-09-20 03:55:15
910347422869618695	interdisciplinary	neutral	2017-09-20 03:38:33
910341023791972353	interdisciplinary	neutral	2017-09-20 03:13:08
910330226516905984	interdisciplinary	neutral	2017-09-20 02:30:13
910328884670935040	interdisciplinary	negative	2017-09-20 02:24:53
910323307408486402	interdisciplinary	neutral	2017-09-20 02:02:44
910320165585289216	interdisciplinary	neutral	2017-09-20 01:50:15
910318835881975808	interdisciplinary	neutral	2017-09-20 01:44:58
910314853155217409	interdisciplinary	positive	2017-09-20 01:29:08
910314338581385216	interdisciplinary	neutral	2017-09-20 01:27:05
910309639140417536	interdisciplinary	positive	2017-09-20 01:08:25
910301931528163328	interdisciplinary	positive	2017-09-20 00:37:47
910300479955062789	interdisciplinary	neutral	2017-09-20 00:32:01
910296786014699520	interdisciplinary	neutral	2017-09-20 00:17:20
910294112225644545	interdisciplinary	neutral	2017-09-20 00:06:43
910292489495613445	interdisciplinary	neutral	2017-09-20 00:00:16
910284525480976384	interdisciplinary	neutral	2017-09-19 23:28:37
910277353552703488	interdisciplinary	neutral	2017-09-19 23:00:07
910276556274196480	interdisciplinary	neutral	2017-09-19 22:56:57
910271668035178497	interdisciplinary	positive	2017-09-19 22:37:32
910267140967682048	interdisciplinary	neutral	2017-09-19 22:19:33
910266899576979456	interdisciplinary	negative	2017-09-19 22:18:35
910264770644860928	interdisciplinary	neutral	2017-09-19 22:10:07
910263841099075584	interdisciplinary	neutral	2017-09-19 22:06:26
910262343682183169	interdisciplinary	neutral	2017-09-19 22:00:29
910259744996249602	interdisciplinary	positive	2017-09-19 21:50:09
910258466182311937	interdisciplinary	positive	2017-09-19 21:45:04
910256270132879363	interdisciplinary	positive	2017-09-19 21:36:21
910254054781050880	interdisciplinary	positive	2017-09-19 21:27:33
910252830115672065	interdisciplinary	neutral	2017-09-19 21:22:41
910244593266053121	interdisciplinary	neutral	2017-09-19 20:49:57
910242206811869185	interdisciplinary	neutral	2017-09-19 20:40:28
910240838428569605	interdisciplinary	neutral	2017-09-19 20:35:01
910240104651911173	interdisciplinary	positive	2017-09-19 20:32:07
910240103196270592	interdisciplinary	positive	2017-09-19 20:32:06
910237970980057088	interdisciplinary	neutral	2017-09-19 20:23:38
910237062972010497	interdisciplinary	neutral	2017-09-19 20:20:01
910235253230448641	interdisciplinary	positive	2017-09-19 20:12:50
910234586675900421	interdisciplinary	neutral	2017-09-19 20:10:11
910234542631403520	interdisciplinary	positive	2017-09-19 20:10:00
910232267708145665	interdisciplinary	neutral	2017-09-19 20:00:58
910231374489153538	interdisciplinary	positive	2017-09-19 19:57:25
910227383998967808	interdisciplinary	neutral	2017-09-19 19:41:34
910227218697277444	interdisciplinary	positive	2017-09-19 19:40:54
910227054506971137	interdisciplinary	neutral	2017-09-19 19:40:15
910222765130682370	interdisciplinary	positive	2017-09-19 19:23:12
910222648629760000	interdisciplinary	neutral	2017-09-19 19:22:45
910220872052625408	interdisciplinary	neutral	2017-09-19 19:15:41
910220210648514560	interdisciplinary	positive	2017-09-19 19:13:03
910220056331612160	interdisciplinary	neutral	2017-09-19 19:12:27
910217471227023360	interdisciplinary	neutral	2017-09-19 19:02:10
910217137809129474	interdisciplinary	positive	2017-09-19 19:00:51
910215439350927362	interdisciplinary	neutral	2017-09-19 18:54:06
910215152972201984	interdisciplinary	neutral	2017-09-19 18:52:58
910213183385800704	interdisciplinary	neutral	2017-09-19 18:45:08
910208072135659523	interdisciplinary	positive	2017-09-19 18:24:49
910203711510712320	interdisciplinary	positive	2017-09-19 18:07:30
910203617365209088	interdisciplinary	positive	2017-09-19 18:07:07
910199048430288903	interdisciplinary	positive	2017-09-19 17:48:58
910196866532429824	interdisciplinary	neutral	2017-09-19 17:40:18
910194434695864321	interdisciplinary	positive	2017-09-19 17:30:38
910194422452834304	interdisciplinary	neutral	2017-09-19 17:30:35
910193783819530245	interdisciplinary	positive	2017-09-19 17:28:03
910193770997731328	interdisciplinary	neutral	2017-09-19 17:28:00
910193269337919488	interdisciplinary	neutral	2017-09-19 17:26:00
910188183693824000	interdisciplinary	positive	2017-09-19 17:05:48
910188023328866304	interdisciplinary	positive	2017-09-19 17:05:09
910186904510967811	interdisciplinary	positive	2017-09-19 17:00:43
910186725468786689	interdisciplinary	positive	2017-09-19 17:00:00
910185698401112064	interdisciplinary	positive	2017-09-19 16:55:55
910185273971101698	interdisciplinary	neutral	2017-09-19 16:54:14
910182130625449984	interdisciplinary	positive	2017-09-19 16:41:44
910180701567438849	interdisciplinary	neutral	2017-09-19 16:36:04
910180533732352000	interdisciplinary	neutral	2017-09-19 16:35:24
910178071902248962	interdisciplinary	positive	2017-09-19 16:25:37
910176208440225792	interdisciplinary	neutral	2017-09-19 16:18:13
910176136885358592	interdisciplinary	neutral	2017-09-19 16:17:55
910173372021166080	interdisciplinary	neutral	2017-09-19 16:06:56
910173010367311872	interdisciplinary	positive	2017-09-19 16:05:30
910172139180974080	interdisciplinary	positive	2017-09-19 16:02:02
910170147960303616	interdisciplinary	neutral	2017-09-19 15:54:08
910169944834416640	interdisciplinary	negative	2017-09-19 15:53:19
910169594056380416	interdisciplinary	positive	2017-09-19 15:51:56
910169493472768000	interdisciplinary	positive	2017-09-19 15:51:32
910168862984896512	interdisciplinary	positive	2017-09-19 15:49:01
910168755694706690	interdisciplinary	neutral	2017-09-19 15:48:36
910168351724511234	interdisciplinary	positive	2017-09-19 15:46:59
910163444170579968	interdisciplinary	neutral	2017-09-19 15:27:29
910162877369262080	interdisciplinary	positive	2017-09-19 15:25:14
910161250746814464	interdisciplinary	neutral	2017-09-19 15:18:46
910160047413571584	interdisciplinary	positive	2017-09-19 15:13:59
910155304834338816	interdisciplinary	neutral	2017-09-19 14:55:09
910152783470497793	interdisciplinary	neutral	2017-09-19 14:45:08
910152666457821185	interdisciplinary	positive	2017-09-19 14:44:40
910152304208351232	interdisciplinary	positive	2017-09-19 14:43:13
910150282440527873	interdisciplinary	neutral	2017-09-19 14:35:11
910150107600912384	interdisciplinary	neutral	2017-09-19 14:34:30
910149399493447681	interdisciplinary	positive	2017-09-19 14:31:41
910147006278127617	interdisciplinary	neutral	2017-09-19 14:22:10
910146816632639488	interdisciplinary	neutral	2017-09-19 14:21:25
910144889471557634	interdisciplinary	positive	2017-09-19 14:13:45
910141891672289281	interdisciplinary	positive	2017-09-19 14:01:51
910139668800299008	interdisciplinary	neutral	2017-09-19 13:53:01
910137449556344832	interdisciplinary	neutral	2017-09-19 13:44:12
910136658527473664	interdisciplinary	neutral	2017-09-19 13:41:03
910136478159818752	interdisciplinary	positive	2017-09-19 13:40:20
910136429799510016	interdisciplinary	positive	2017-09-19 13:40:09
910133618432970752	interdisciplinary	neutral	2017-09-19 13:28:58
910131206032908288	interdisciplinary	neutral	2017-09-19 13:19:23
910131131273613314	interdisciplinary	neutral	2017-09-19 13:19:05
910128030416293888	interdisciplinary	neutral	2017-09-19 13:06:46
910126907437600768	interdisciplinary	positive	2017-09-19 13:02:18
910126850952843265	interdisciplinary	neutral	2017-09-19 13:02:05
910126614742278146	interdisciplinary	neutral	2017-09-19 13:01:08
910126604495544320	interdisciplinary	positive	2017-09-19 13:01:06
910126128366530561	interdisciplinary	neutral	2017-09-19 12:59:12
910123043112017920	interdisciplinary	neutral	2017-09-19 12:46:57
910117551975292933	interdisciplinary	positive	2017-09-19 12:25:08
910113073398153216	interdisciplinary	positive	2017-09-19 12:07:20
910112782032437248	interdisciplinary	positive	2017-09-19 12:06:10
910111809532829696	interdisciplinary	positive	2017-09-19 12:02:19
910108498075308037	interdisciplinary	negative	2017-09-19 11:49:09
910107209111044096	interdisciplinary	positive	2017-09-19 11:44:02
910104518398038017	interdisciplinary	neutral	2017-09-19 11:33:20
910097453185208320	interdisciplinary	neutral	2017-09-19 11:05:16
910091575270809601	interdisciplinary	positive	2017-09-19 10:41:54
910085252151877632	interdisciplinary	positive	2017-09-19 10:16:47
910082048534155265	interdisciplinary	neutral	2017-09-19 10:04:03
910079864547442688	interdisciplinary	neutral	2017-09-19 09:55:22
910077868780204032	interdisciplinary	positive	2017-09-19 09:47:27
910076531048943617	interdisciplinary	neutral	2017-09-19 09:42:08
910075996849573888	interdisciplinary	neutral	2017-09-19 09:40:00
910072247410479104	interdisciplinary	positive	2017-09-19 09:25:06
910068821590978561	interdisciplinary	positive	2017-09-19 09:11:29
910067343006593024	interdisciplinary	neutral	2017-09-19 09:05:37
910066097071812608	interdisciplinary	neutral	2017-09-19 09:00:40
910063082478690304	interdisciplinary	positive	2017-09-19 08:48:41
910059696148623360	interdisciplinary	positive	2017-09-19 08:35:14
910055067688062976	interdisciplinary	neutral	2017-09-19 08:16:50
910053380025982976	interdisciplinary	neutral	2017-09-19 08:10:08
910047251833266177	interdisciplinary	positive	2017-09-19 07:45:47
910045023722283008	interdisciplinary	neutral	2017-09-19 07:36:56
910039766946676736	interdisciplinary	neutral	2017-09-19 07:16:02
910037305913524224	interdisciplinary	positive	2017-09-19 07:06:16
910034713712177158	interdisciplinary	neutral	2017-09-19 06:55:58
910017791603892224	interdisciplinary	positive	2017-09-19 05:48:43
910003975205744640	interdisciplinary	neutral	2017-09-19 04:53:49
909987209834573824	interdisciplinary	neutral	2017-09-19 03:47:12
909980849864658944	interdisciplinary	positive	2017-09-19 03:21:55
909980017156923393	interdisciplinary	positive	2017-09-19 03:18:37
909969837539184640	interdisciplinary	neutral	2017-09-19 02:38:10
909961349534326785	interdisciplinary	neutral	2017-09-19 02:04:26
909957663143768064	interdisciplinary	positive	2017-09-19 01:49:47
909955158007795712	interdisciplinary	neutral	2017-09-19 01:39:50
909949552119156736	interdisciplinary	positive	2017-09-19 01:17:33
909944984698327040	interdisciplinary	neutral	2017-09-19 00:59:24
909943384701374465	interdisciplinary	positive	2017-09-19 00:53:03
909937717110124544	interdisciplinary	positive	2017-09-19 00:30:32
909933037030428672	interdisciplinary	positive	2017-09-19 00:11:56
909929573797699584	interdisciplinary	neutral	2017-09-18 23:58:10
909915183442690048	interdisciplinary	neutral	2017-09-18 23:00:59
909913698197819392	interdisciplinary	negative	2017-09-18 22:55:05
909911743253561344	interdisciplinary	neutral	2017-09-18 22:47:19
909910547059085312	interdisciplinary	neutral	2017-09-18 22:42:34
909906264637009921	interdisciplinary	positive	2017-09-18 22:25:33
909905994305593344	interdisciplinary	positive	2017-09-18 22:24:28
909901129986789378	interdisciplinary	neutral	2017-09-18 22:05:09
909900434692874240	interdisciplinary	neutral	2017-09-18 22:02:23
909899867337613313	interdisciplinary	positive	2017-09-18 22:00:08
957401938219470848	interdisciplinary	positive	2018-01-27 23:56:24
957399251847471104	interdisciplinary	positive	2018-01-27 23:45:43
957394055477932032	interdisciplinary	positive	2018-01-27 23:25:05
957386180861071361	interdisciplinary	positive	2018-01-27 22:53:47
957377526480990212	interdisciplinary	neutral	2018-01-27 22:19:24
957370584110981120	interdisciplinary	positive	2018-01-27 21:51:48
957369930495782912	interdisciplinary	positive	2018-01-27 21:49:13
957359897020129280	interdisciplinary	positive	2018-01-27 21:09:20
957357683379724289	interdisciplinary	neutral	2018-01-27 21:00:33
957356064151924738	interdisciplinary	neutral	2018-01-27 20:54:07
957354122721878016	interdisciplinary	positive	2018-01-27 20:46:24
957347177235324928	interdisciplinary	positive	2018-01-27 20:18:48
957343930915307521	interdisciplinary	neutral	2018-01-27 20:05:54
957339174561972224	interdisciplinary	neutral	2018-01-27 19:47:00
957336179887788032	interdisciplinary	neutral	2018-01-27 19:35:06
957332221370781696	interdisciplinary	neutral	2018-01-27 19:19:22
957328498355556352	interdisciplinary	positive	2018-01-27 19:04:34
957324083221417987	interdisciplinary	positive	2018-01-27 18:47:02
957323110398689282	interdisciplinary	neutral	2018-01-27 18:43:10
957314829307531266	interdisciplinary	neutral	2018-01-27 18:10:16
957313154190626816	interdisciplinary	positive	2018-01-27 18:03:36
957312526332649472	interdisciplinary	neutral	2018-01-27 18:01:06
957311022913683456	interdisciplinary	positive	2018-01-27 17:55:08
957305973185662977	interdisciplinary	neutral	2018-01-27 17:35:04
957305662555480065	interdisciplinary	positive	2018-01-27 17:33:50
957304089754439680	interdisciplinary	neutral	2018-01-27 17:27:35
957296286570569728	interdisciplinary	neutral	2018-01-27 16:56:35
957295893954183168	interdisciplinary	neutral	2018-01-27 16:55:01
957292051128762368	interdisciplinary	neutral	2018-01-27 16:39:45
957287969760702465	interdisciplinary	neutral	2018-01-27 16:23:32
957287897559961603	interdisciplinary	neutral	2018-01-27 16:23:14
957287572711137280	interdisciplinary	neutral	2018-01-27 16:21:57
957286960095268865	interdisciplinary	neutral	2018-01-27 16:19:31
957282622392107010	interdisciplinary	neutral	2018-01-27 16:02:17
957279607308390400	interdisciplinary	neutral	2018-01-27 15:50:18
957277724309180416	interdisciplinary	positive	2018-01-27 15:42:49
957276786378801153	interdisciplinary	neutral	2018-01-27 15:39:05
957275715388563456	interdisciplinary	neutral	2018-01-27 15:34:50
957274606380953603	interdisciplinary	neutral	2018-01-27 15:30:26
957273274504925184	interdisciplinary	neutral	2018-01-27 15:25:08
957269965878554627	interdisciplinary	positive	2018-01-27 15:11:59
957267081552162818	interdisciplinary	neutral	2018-01-27 15:00:32
957264386439204864	interdisciplinary	negative	2018-01-27 14:49:49
957262681819541504	interdisciplinary	positive	2018-01-27 14:43:03
957262578820018177	interdisciplinary	positive	2018-01-27 14:42:38
957258607355154438	interdisciplinary	neutral	2018-01-27 14:26:51
957255626337513472	interdisciplinary	neutral	2018-01-27 14:15:00
957251338341113858	interdisciplinary	neutral	2018-01-27 13:57:58
957237049488216065	interdisciplinary	neutral	2018-01-27 13:01:11
957235386086019073	interdisciplinary	positive	2018-01-27 12:54:35
957233600512053248	interdisciplinary	neutral	2018-01-27 12:47:29
957230424350183427	interdisciplinary	neutral	2018-01-27 12:34:52
957228494907498496	interdisciplinary	positive	2018-01-27 12:27:12
957226938514460673	interdisciplinary	neutral	2018-01-27 12:21:01
957225710938148865	interdisciplinary	neutral	2018-01-27 12:16:08
957221486795874304	interdisciplinary	neutral	2018-01-27 11:59:21
957214154364018688	interdisciplinary	positive	2018-01-27 11:30:13
957211491194888192	interdisciplinary	negative	2018-01-27 11:19:38
957202992289271808	interdisciplinary	positive	2018-01-27 10:45:51
957201845436461056	interdisciplinary	positive	2018-01-27 10:41:18
957198184442421249	interdisciplinary	neutral	2018-01-27 10:26:45
957197488137568256	interdisciplinary	neutral	2018-01-27 10:23:59
957190876794507264	interdisciplinary	neutral	2018-01-27 09:57:43
957186175130841089	interdisciplinary	positive	2018-01-27 09:39:02
957185965801508864	interdisciplinary	negative	2018-01-27 09:38:12
957183370135592960	interdisciplinary	neutral	2018-01-27 09:27:53
957183184160153605	interdisciplinary	neutral	2018-01-27 09:27:09
957172249110474753	interdisciplinary	neutral	2018-01-27 08:43:42
957162693336723456	interdisciplinary	neutral	2018-01-27 08:05:43
957161926810849281	interdisciplinary	positive	2018-01-27 08:02:41
957161888286232577	interdisciplinary	neutral	2018-01-27 08:02:32
957137439423950848	interdisciplinary	positive	2018-01-27 06:25:22
957129500311003136	interdisciplinary	positive	2018-01-27 05:53:50
957128482286313472	interdisciplinary	neutral	2018-01-27 05:49:47
957104768131981312	interdisciplinary	neutral	2018-01-27 04:15:33
957080057813635072	interdisciplinary	neutral	2018-01-27 02:37:22
957077011301916673	interdisciplinary	neutral	2018-01-27 02:25:15
957067049234137088	interdisciplinary	neutral	2018-01-27 01:45:40
957058513775153152	interdisciplinary	neutral	2018-01-27 01:11:45
957058275278716929	interdisciplinary	positive	2018-01-27 01:10:48
957045315172839424	interdisciplinary	positive	2018-01-27 00:19:18
957043929202835456	interdisciplinary	positive	2018-01-27 00:13:48
933842773408489472	interdisciplinary	positive	2017-11-23 23:40:41
933837808275517440	interdisciplinary	positive	2017-11-23 23:20:58
933836927991799808	interdisciplinary	neutral	2017-11-23 23:17:28
933834701588127750	interdisciplinary	neutral	2017-11-23 23:08:37
933832633322221568	interdisciplinary	neutral	2017-11-23 23:00:24
933825823089483776	interdisciplinary	positive	2017-11-23 22:33:20
933820269025726464	interdisciplinary	neutral	2017-11-23 22:11:16
933817596243267587	interdisciplinary	positive	2017-11-23 22:00:39
933815254575804417	interdisciplinary	positive	2017-11-23 21:51:20
933808663055163392	interdisciplinary	neutral	2017-11-23 21:25:09
933802574502944769	interdisciplinary	neutral	2017-11-23 21:00:57
933801557828583424	interdisciplinary	positive	2017-11-23 20:56:55
933800967543410688	interdisciplinary	positive	2017-11-23 20:54:34
933799008971010049	interdisciplinary	positive	2017-11-23 20:46:47
933795140174413824	interdisciplinary	positive	2017-11-23 20:31:25
933790838299222021	interdisciplinary	positive	2017-11-23 20:14:19
933785923715829760	interdisciplinary	positive	2017-11-23 19:54:47
933783978481295360	interdisciplinary	neutral	2017-11-23 19:47:03
933778312190668801	interdisciplinary	neutral	2017-11-23 19:24:33
933774095879196672	interdisciplinary	positive	2017-11-23 19:07:47
933773796154146816	interdisciplinary	positive	2017-11-23 19:06:36
933772529382121473	interdisciplinary	positive	2017-11-23 19:01:34
933768732819836929	interdisciplinary	positive	2017-11-23 18:46:29
933764596065865728	interdisciplinary	positive	2017-11-23 18:30:02
933761587781005314	interdisciplinary	neutral	2017-11-23 18:18:05
933760135008309248	interdisciplinary	positive	2017-11-23 18:12:19
933754967525154816	interdisciplinary	positive	2017-11-23 17:51:47
933754005813067776	interdisciplinary	positive	2017-11-23 17:47:57
933752235569352705	interdisciplinary	neutral	2017-11-23 17:40:55
933746796458856450	interdisciplinary	positive	2017-11-23 17:19:19
933745601094864901	interdisciplinary	positive	2017-11-23 17:14:34
933741225139671041	interdisciplinary	neutral	2017-11-23 16:57:10
933740661165232128	interdisciplinary	neutral	2017-11-23 16:54:56
933736329577410560	interdisciplinary	positive	2017-11-23 16:37:43
933731890812604416	interdisciplinary	positive	2017-11-23 16:20:05
933727330580738049	interdisciplinary	positive	2017-11-23 16:01:58
933726864681652225	interdisciplinary	neutral	2017-11-23 16:00:07
933726844716687360	interdisciplinary	positive	2017-11-23 16:00:02
933725273257840645	interdisciplinary	neutral	2017-11-23 15:53:47
933721067662737408	interdisciplinary	neutral	2017-11-23 15:37:04
933717275173097473	interdisciplinary	positive	2017-11-23 15:22:00
933716212046950400	interdisciplinary	positive	2017-11-23 15:17:47
933715798719217664	interdisciplinary	negative	2017-11-23 15:16:08
933714919719018496	interdisciplinary	positive	2017-11-23 15:12:39
933710407193284608	interdisciplinary	neutral	2017-11-23 14:54:43
933708056231403520	interdisciplinary	neutral	2017-11-23 14:45:22
933708008282116097	interdisciplinary	neutral	2017-11-23 14:45:11
933706775102181377	interdisciplinary	neutral	2017-11-23 14:40:17
933701997546545158	interdisciplinary	positive	2017-11-23 14:21:18
933697461746585600	interdisciplinary	neutral	2017-11-23 14:03:16
933696966864797698	interdisciplinary	neutral	2017-11-23 14:01:18
920569755328827392	interdisciplinary	neutral	2017-10-18 08:38:27
920568616311017472	interdisciplinary	neutral	2017-10-18 08:33:56
920568571650101248	interdisciplinary	neutral	2017-10-18 08:33:45
920566329622405120	interdisciplinary	neutral	2017-10-18 08:24:50
920561902786187265	interdisciplinary	positive	2017-10-18 08:07:15
920556910805438464	interdisciplinary	neutral	2017-10-18 07:47:25
920554516721913856	interdisciplinary	positive	2017-10-18 07:37:54
920553231536807936	interdisciplinary	positive	2017-10-18 07:32:48
920551117947326464	interdisciplinary	neutral	2017-10-18 07:24:24
920549268619796480	interdisciplinary	positive	2017-10-18 07:17:03
920545033421574144	interdisciplinary	neutral	2017-10-18 07:00:13
920530930820771842	interdisciplinary	neutral	2017-10-18 06:04:11
920522596197814273	interdisciplinary	positive	2017-10-18 05:31:04
920519818654175233	interdisciplinary	positive	2017-10-18 05:20:01
920513086913761280	interdisciplinary	neutral	2017-10-18 04:53:16
920502224668844032	interdisciplinary	neutral	2017-10-18 04:10:07
920501863665098752	interdisciplinary	positive	2017-10-18 04:08:41
920493032889188352	interdisciplinary	positive	2017-10-18 03:33:35
920491813596729344	interdisciplinary	neutral	2017-10-18 03:28:44
920490714500251653	interdisciplinary	neutral	2017-10-18 03:24:22
920472604695285760	interdisciplinary	positive	2017-10-18 02:12:25
920466644488552448	interdisciplinary	neutral	2017-10-18 01:48:44
920460138787561473	interdisciplinary	positive	2017-10-18 01:22:53
920459091436126208	interdisciplinary	positive	2017-10-18 01:18:43
920458341402361856	interdisciplinary	positive	2017-10-18 01:15:44
920456921337008129	interdisciplinary	positive	2017-10-18 01:10:05
920454536938041349	interdisciplinary	neutral	2017-10-18 01:00:37
920451443726934016	interdisciplinary	neutral	2017-10-18 00:48:20
920449609381453825	interdisciplinary	positive	2017-10-18 00:41:02
920449575730728961	interdisciplinary	positive	2017-10-18 00:40:54
920446831229849601	interdisciplinary	neutral	2017-10-18 00:30:00
920444628905623553	interdisciplinary	positive	2017-10-18 00:21:15
920438349483184129	interdisciplinary	neutral	2017-10-17 23:56:18
920437990694031361	interdisciplinary	positive	2017-10-17 23:54:52
920437664905678858	interdisciplinary	positive	2017-10-17 23:53:34
920437108107390976	interdisciplinary	positive	2017-10-17 23:51:22
920432009633288192	interdisciplinary	positive	2017-10-17 23:31:06
920429102460538880	interdisciplinary	neutral	2017-10-17 23:19:33
920425883235766272	interdisciplinary	neutral	2017-10-17 23:06:45
920424687141711875	interdisciplinary	neutral	2017-10-17 23:02:00
920420594817966081	interdisciplinary	neutral	2017-10-17 22:45:45
920420396893114369	interdisciplinary	positive	2017-10-17 22:44:57
920416723651543040	interdisciplinary	positive	2017-10-17 22:30:22
920416650079371264	interdisciplinary	neutral	2017-10-17 22:30:04
920414647236354048	interdisciplinary	positive	2017-10-17 22:22:07
920413990559330306	interdisciplinary	negative	2017-10-17 22:19:30
920405357981327365	interdisciplinary	positive	2017-10-17 21:45:12
920398145401470977	interdisciplinary	positive	2017-10-17 21:16:32
920396548005089280	interdisciplinary	neutral	2017-10-17 21:10:11
920395947682816001	interdisciplinary	positive	2017-10-17 21:07:48
920394552665694210	interdisciplinary	neutral	2017-10-17 21:02:16
920392422764326912	interdisciplinary	positive	2017-10-17 20:53:48
920389770269872129	interdisciplinary	neutral	2017-10-17 20:43:15
920388275658878976	interdisciplinary	neutral	2017-10-17 20:37:19
920384962066489344	interdisciplinary	neutral	2017-10-17 20:24:09
920382919696404488	interdisciplinary	neutral	2017-10-17 20:16:02
920381277332795392	interdisciplinary	positive	2017-10-17 20:09:31
920374053147377664	interdisciplinary	positive	2017-10-17 19:40:48
920372910375821313	interdisciplinary	positive	2017-10-17 19:36:16
920369638084620288	interdisciplinary	positive	2017-10-17 19:23:16
920365050589794304	interdisciplinary	neutral	2017-10-17 19:05:02
920364078610071552	interdisciplinary	positive	2017-10-17 19:01:10
920363225094373377	interdisciplinary	positive	2017-10-17 18:57:47
920362718229495808	interdisciplinary	positive	2017-10-17 18:55:46
920361539458215936	interdisciplinary	neutral	2017-10-17 18:51:05
920358498986283008	interdisciplinary	positive	2017-10-17 18:39:00
920358344287666176	interdisciplinary	positive	2017-10-17 18:38:23
920358159935406081	interdisciplinary	neutral	2017-10-17 18:37:39
920356901241655296	interdisciplinary	neutral	2017-10-17 18:32:39
920356338424827905	interdisciplinary	positive	2017-10-17 18:30:25
920354249355218944	interdisciplinary	positive	2017-10-17 18:22:07
920347456344387585	interdisciplinary	negative	2017-10-17 17:55:07
920345383372492800	interdisciplinary	positive	2017-10-17 17:46:53
920342730571681795	interdisciplinary	positive	2017-10-17 17:36:20
920336952745918471	interdisciplinary	positive	2017-10-17 17:13:23
920336765839400961	interdisciplinary	positive	2017-10-17 17:12:38
920334257725337600	interdisciplinary	neutral	2017-10-17 17:02:40
920333685634818048	interdisciplinary	neutral	2017-10-17 17:00:24
920329243426308096	interdisciplinary	positive	2017-10-17 16:42:45
920329123414839297	interdisciplinary	positive	2017-10-17 16:42:16
920326288992333826	interdisciplinary	positive	2017-10-17 16:31:00
920324068208992256	interdisciplinary	neutral	2017-10-17 16:22:11
920320312897605634	interdisciplinary	neutral	2017-10-17 16:07:15
920318623536709634	interdisciplinary	positive	2017-10-17 16:00:33
920318488710856704	interdisciplinary	neutral	2017-10-17 16:00:01
920318053388136448	interdisciplinary	positive	2017-10-17 15:58:17
920316019083792384	interdisciplinary	positive	2017-10-17 15:50:12
920315624915685376	interdisciplinary	positive	2017-10-17 15:48:38
920314819403710464	interdisciplinary	neutral	2017-10-17 15:45:26
920314200769130496	interdisciplinary	positive	2017-10-17 15:42:58
920311691082190848	interdisciplinary	neutral	2017-10-17 15:33:00
920308831111954433	interdisciplinary	positive	2017-10-17 15:21:38
920308638828384262	interdisciplinary	positive	2017-10-17 15:20:52
920308152578510848	interdisciplinary	positive	2017-10-17 15:18:56
920306896099147777	interdisciplinary	positive	2017-10-17 15:13:57
920305171917185024	interdisciplinary	positive	2017-10-17 15:07:06
920305149989486592	interdisciplinary	neutral	2017-10-17 15:07:00
920299465436749825	interdisciplinary	positive	2017-10-17 14:44:25
920297727136796672	interdisciplinary	positive	2017-10-17 14:37:31
920288888022814720	interdisciplinary	neutral	2017-10-17 14:02:23
920288289151705088	interdisciplinary	neutral	2017-10-17 14:00:00
920285733335822336	interdisciplinary	positive	2017-10-17 13:49:51
920285479697813504	interdisciplinary	neutral	2017-10-17 13:48:51
920282345894285313	interdisciplinary	positive	2017-10-17 13:36:23
920281194448801792	interdisciplinary	negative	2017-10-17 13:31:49
920280555891064832	interdisciplinary	neutral	2017-10-17 13:29:17
920279762798555136	interdisciplinary	positive	2017-10-17 13:26:08
920279502881742850	interdisciplinary	neutral	2017-10-17 13:25:06
920278261871104000	interdisciplinary	positive	2017-10-17 13:20:10
920275249530376192	interdisciplinary	neutral	2017-10-17 13:08:12
920273274310938624	interdisciplinary	neutral	2017-10-17 13:00:21
920272020256051201	interdisciplinary	neutral	2017-10-17 12:55:22
920265639293521920	interdisciplinary	neutral	2017-10-17 12:30:00
920265301698244608	interdisciplinary	positive	2017-10-17 12:28:40
920264148671520768	interdisciplinary	positive	2017-10-17 12:24:05
920262947099828227	interdisciplinary	neutral	2017-10-17 12:19:18
920262817122586624	interdisciplinary	neutral	2017-10-17 12:18:47
920261378115375104	interdisciplinary	neutral	2017-10-17 12:13:04
920260640110936064	interdisciplinary	positive	2017-10-17 12:10:08
920258460322844673	interdisciplinary	neutral	2017-10-17 12:01:29
920258091777605632	interdisciplinary	neutral	2017-10-17 12:00:01
920257737950457857	interdisciplinary	positive	2017-10-17 11:58:36
920252257979064320	interdisciplinary	positive	2017-10-17 11:36:50
920251140939411457	interdisciplinary	positive	2017-10-17 11:32:24
920246090024275968	interdisciplinary	neutral	2017-10-17 11:12:19
920235823362183170	interdisciplinary	neutral	2017-10-17 10:31:32
920232738220920832	interdisciplinary	neutral	2017-10-17 10:19:16
920232340437241858	interdisciplinary	neutral	2017-10-17 10:17:41
920231699144937472	interdisciplinary	neutral	2017-10-17 10:15:08
920231436292182016	interdisciplinary	neutral	2017-10-17 10:14:06
920229810902794240	interdisciplinary	neutral	2017-10-17 10:07:38
920227696877166597	interdisciplinary	neutral	2017-10-17 09:59:14
920220461094653952	interdisciplinary	neutral	2017-10-17 09:30:29
920220273504333824	interdisciplinary	positive	2017-10-17 09:29:44
920216912226848768	interdisciplinary	neutral	2017-10-17 09:16:23
920215308736004098	interdisciplinary	neutral	2017-10-17 09:10:01
920214948185116672	interdisciplinary	neutral	2017-10-17 09:08:35
920208882894622720	interdisciplinary	neutral	2017-10-17 08:44:28
920207965033922560	interdisciplinary	neutral	2017-10-17 08:40:50
920207635537829888	interdisciplinary	positive	2017-10-17 08:39:31
920206992165277696	interdisciplinary	positive	2017-10-17 08:36:58
920206247827296256	interdisciplinary	positive	2017-10-17 08:34:00
920205356722262016	interdisciplinary	positive	2017-10-17 08:30:28
930341785179709441	interdisciplinary	neutral	2017-11-14 07:49:01
930339048337666048	interdisciplinary	positive	2017-11-14 07:38:08
930338306910547968	interdisciplinary	positive	2017-11-14 07:35:11
930337845486784513	interdisciplinary	neutral	2017-11-14 07:33:21
930335753388810240	interdisciplinary	positive	2017-11-14 07:25:03
930334683040231424	interdisciplinary	neutral	2017-11-14 07:20:47
930333940522500096	interdisciplinary	positive	2017-11-14 07:17:50
930321682698350598	interdisciplinary	positive	2017-11-14 06:29:08
930303357809451008	interdisciplinary	neutral	2017-11-14 05:16:19
930302029649416193	interdisciplinary	neutral	2017-11-14 05:11:02
930301141916585984	interdisciplinary	neutral	2017-11-14 05:07:31
930299512580587520	interdisciplinary	positive	2017-11-14 05:01:02
930291384396812288	interdisciplinary	positive	2017-11-14 04:28:44
930287980551462912	interdisciplinary	neutral	2017-11-14 04:15:13
930283614130065408	interdisciplinary	neutral	2017-11-14 03:57:52
930275371764690944	interdisciplinary	neutral	2017-11-14 03:25:06
930273583804403713	interdisciplinary	positive	2017-11-14 03:18:00
930269115436199936	interdisciplinary	neutral	2017-11-14 03:00:15
930247753388691456	interdisciplinary	negative	2017-11-14 01:35:22
930246459693387776	interdisciplinary	neutral	2017-11-14 01:30:13
930243989520842752	interdisciplinary	positive	2017-11-14 01:20:24
930234613255065601	interdisciplinary	positive	2017-11-14 00:43:09
930231648062398465	interdisciplinary	neutral	2017-11-14 00:31:22
930230789068877824	interdisciplinary	positive	2017-11-14 00:27:57
930229845229015040	interdisciplinary	neutral	2017-11-14 00:24:12
930229373944434688	interdisciplinary	positive	2017-11-14 00:22:20
930226918925926400	interdisciplinary	positive	2017-11-14 00:12:34
930216910536417280	interdisciplinary	neutral	2017-11-13 23:32:48
930215105266057217	interdisciplinary	positive	2017-11-13 23:25:38
930210438796795904	interdisciplinary	neutral	2017-11-13 23:07:05
930209035399385089	interdisciplinary	positive	2017-11-13 23:01:31
930208667785408512	interdisciplinary	neutral	2017-11-13 23:00:03
930205333989060608	interdisciplinary	positive	2017-11-13 22:46:48
930204969516507136	interdisciplinary	neutral	2017-11-13 22:45:21
930204113962274816	interdisciplinary	positive	2017-11-13 22:41:57
930203258555129857	interdisciplinary	positive	2017-11-13 22:38:33
930196119065374721	interdisciplinary	positive	2017-11-13 22:10:11
930195734623694848	interdisciplinary	neutral	2017-11-13 22:08:39
930192913849573378	interdisciplinary	positive	2017-11-13 21:57:27
930192334469369857	interdisciplinary	neutral	2017-11-13 21:55:09
930185572387258368	interdisciplinary	positive	2017-11-13 21:28:17
930185000670105600	interdisciplinary	positive	2017-11-13 21:26:00
930180077446459397	interdisciplinary	positive	2017-11-13 21:06:27
930179064522072064	interdisciplinary	neutral	2017-11-13 21:02:25
930178984201129984	interdisciplinary	positive	2017-11-13 21:02:06
930178320708263936	interdisciplinary	positive	2017-11-13 20:59:28
930177840754151427	interdisciplinary	neutral	2017-11-13 20:57:33
930177115898744838	interdisciplinary	neutral	2017-11-13 20:54:40
930176412241223680	interdisciplinary	positive	2017-11-13 20:51:53
930175893821116417	interdisciplinary	neutral	2017-11-13 20:49:49
930175409492234240	interdisciplinary	positive	2017-11-13 20:47:54
930173515570937858	interdisciplinary	positive	2017-11-13 20:40:22
930172439069327360	interdisciplinary	neutral	2017-11-13 20:36:05
930172129252954113	interdisciplinary	positive	2017-11-13 20:34:52
930171423875911681	interdisciplinary	positive	2017-11-13 20:32:03
930171255440986112	interdisciplinary	neutral	2017-11-13 20:31:23
930170814900719617	interdisciplinary	positive	2017-11-13 20:29:38
930168176205357057	interdisciplinary	neutral	2017-11-13 20:19:09
930166774951284737	interdisciplinary	neutral	2017-11-13 20:13:35
930166712166637568	interdisciplinary	neutral	2017-11-13 20:13:20
930164005699645440	interdisciplinary	neutral	2017-11-13 20:02:35
930163345793126400	interdisciplinary	positive	2017-11-13 19:59:57
930162216166342656	interdisciplinary	neutral	2017-11-13 19:55:28
930159510135693312	interdisciplinary	neutral	2017-11-13 19:44:43
930159086225813505	interdisciplinary	neutral	2017-11-13 19:43:02
930155850907336704	interdisciplinary	positive	2017-11-13 19:30:10
930152888105496576	interdisciplinary	neutral	2017-11-13 19:18:24
930151285281697793	interdisciplinary	neutral	2017-11-13 19:12:02
930150829616783360	interdisciplinary	positive	2017-11-13 19:10:13
930149646357458945	interdisciplinary	positive	2017-11-13 19:05:31
930149534570819585	interdisciplinary	neutral	2017-11-13 19:05:05
930149518376669184	interdisciplinary	neutral	2017-11-13 19:05:01
930148487852904450	interdisciplinary	positive	2017-11-13 19:00:55
930135715547176967	interdisciplinary	neutral	2017-11-13 18:10:10
930134724583890944	interdisciplinary	positive	2017-11-13 18:06:14
930134451111301122	interdisciplinary	neutral	2017-11-13 18:05:08
930133438446931970	interdisciplinary	positive	2017-11-13 18:01:07
930133049064546305	interdisciplinary	neutral	2017-11-13 17:59:34
930132207510937606	interdisciplinary	neutral	2017-11-13 17:56:13
930129130124926977	interdisciplinary	positive	2017-11-13 17:44:00
930128700988952578	interdisciplinary	neutral	2017-11-13 17:42:17
930127238674243584	interdisciplinary	positive	2017-11-13 17:36:29
930126975502516224	interdisciplinary	positive	2017-11-13 17:35:26
930126498006257664	interdisciplinary	neutral	2017-11-13 17:33:32
930126255642611712	interdisciplinary	positive	2017-11-13 17:32:34
930126151946776576	interdisciplinary	neutral	2017-11-13 17:32:10
930125969540739072	interdisciplinary	positive	2017-11-13 17:31:26
930125542107635714	interdisciplinary	positive	2017-11-13 17:29:44
930124446836445184	interdisciplinary	positive	2017-11-13 17:25:23
930123674564341760	interdisciplinary	neutral	2017-11-13 17:22:19
930122765788762112	interdisciplinary	positive	2017-11-13 17:18:42
930122638848024576	interdisciplinary	neutral	2017-11-13 17:18:12
930121906702962688	interdisciplinary	neutral	2017-11-13 17:15:18
930121122481258496	interdisciplinary	positive	2017-11-13 17:12:11
930120668603146240	interdisciplinary	positive	2017-11-13 17:10:22
930118810937516032	interdisciplinary	negative	2017-11-13 17:02:59
930118696470827008	interdisciplinary	neutral	2017-11-13 17:02:32
930118366999797760	interdisciplinary	neutral	2017-11-13 17:01:14
930117446186557440	interdisciplinary	positive	2017-11-13 16:57:34
930117319728214017	interdisciplinary	positive	2017-11-13 16:57:04
930115340302016513	interdisciplinary	neutral	2017-11-13 16:49:12
930110996617875456	interdisciplinary	positive	2017-11-13 16:31:56
930108388985528320	interdisciplinary	positive	2017-11-13 16:21:35
930107511574880257	interdisciplinary	neutral	2017-11-13 16:18:05
930107035437486081	interdisciplinary	neutral	2017-11-13 16:16:12
930104909575401472	interdisciplinary	neutral	2017-11-13 16:07:45
930103199012474881	interdisciplinary	positive	2017-11-13 16:00:57
930101003466063872	interdisciplinary	positive	2017-11-13 15:52:14
930098445284556800	interdisciplinary	positive	2017-11-13 15:42:04
930096419440070657	interdisciplinary	neutral	2017-11-13 15:34:01
930095420361015297	interdisciplinary	neutral	2017-11-13 15:30:03
930094004531810304	interdisciplinary	positive	2017-11-13 15:24:25
930091022742417408	interdisciplinary	neutral	2017-11-13 15:12:34
930090514921283584	interdisciplinary	neutral	2017-11-13 15:10:33
930089137532755968	interdisciplinary	positive	2017-11-13 15:05:05
930085077563924480	interdisciplinary	neutral	2017-11-13 14:48:57
930081602595639297	interdisciplinary	positive	2017-11-13 14:35:08
930080698811027456	interdisciplinary	neutral	2017-11-13 14:31:33
930080144773058561	interdisciplinary	positive	2017-11-13 14:29:21
930078331483181057	interdisciplinary	positive	2017-11-13 14:22:08
930074274911490048	interdisciplinary	neutral	2017-11-13 14:06:01
930072762022088704	interdisciplinary	positive	2017-11-13 14:00:01
930072567351783426	interdisciplinary	positive	2017-11-13 13:59:14
930068868512518144	interdisciplinary	positive	2017-11-13 13:44:32
930065280285409281	interdisciplinary	positive	2017-11-13 13:30:17
930063575875571712	interdisciplinary	positive	2017-11-13 13:23:30
930062454683570176	interdisciplinary	neutral	2017-11-13 13:19:03
930061025583550465	interdisciplinary	neutral	2017-11-13 13:13:22
930060390993747968	interdisciplinary	positive	2017-11-13 13:10:51
930059325397184512	interdisciplinary	positive	2017-11-13 13:06:37
930058454928183298	interdisciplinary	positive	2017-11-13 13:03:09
930058422929813506	interdisciplinary	positive	2017-11-13 13:03:02
930057667921563648	interdisciplinary	neutral	2017-11-13 13:00:02
930057374240559104	interdisciplinary	neutral	2017-11-13 12:58:52
930055961133412353	interdisciplinary	neutral	2017-11-13 12:53:15
930051344848904192	interdisciplinary	positive	2017-11-13 12:34:54
930049123725832192	interdisciplinary	positive	2017-11-13 12:26:05
930048623697645568	interdisciplinary	neutral	2017-11-13 12:24:06
930048249637015552	interdisciplinary	positive	2017-11-13 12:22:36
930044096487612417	interdisciplinary	positive	2017-11-13 12:06:06
930043883152723969	interdisciplinary	neutral	2017-11-13 12:05:15
930038490498203648	interdisciplinary	neutral	2017-11-13 11:43:50
930036461138792448	interdisciplinary	neutral	2017-11-13 11:35:46
930035038128955392	interdisciplinary	neutral	2017-11-13 11:30:06
930031179704750080	interdisciplinary	neutral	2017-11-13 11:14:47
930031014222749696	interdisciplinary	neutral	2017-11-13 11:14:07
930029428733771777	interdisciplinary	positive	2017-11-13 11:07:49
930028845352345600	interdisciplinary	neutral	2017-11-13 11:05:30
930026382033412096	interdisciplinary	neutral	2017-11-13 10:55:43
930021939975827456	interdisciplinary	neutral	2017-11-13 10:38:04
930021207851847680	interdisciplinary	positive	2017-11-13 10:35:09
930014129888342016	interdisciplinary	neutral	2017-11-13 10:07:02
930013774324649984	interdisciplinary	positive	2017-11-13 10:05:37
930012947249881088	interdisciplinary	neutral	2017-11-13 10:02:20
930011689856225281	interdisciplinary	neutral	2017-11-13 09:57:20
930009489939533824	interdisciplinary	neutral	2017-11-13 09:48:35
930008121556307968	interdisciplinary	neutral	2017-11-13 09:43:09
930003570488946688	interdisciplinary	neutral	2017-11-13 09:25:04
929995745494814720	interdisciplinary	neutral	2017-11-13 08:53:58
929994705584222208	interdisciplinary	neutral	2017-11-13 08:49:50
929993334478835712	interdisciplinary	neutral	2017-11-13 08:44:24
929991287847124992	interdisciplinary	positive	2017-11-13 08:36:16
929989718288359424	interdisciplinary	neutral	2017-11-13 08:30:01
929983812771164161	interdisciplinary	positive	2017-11-13 08:06:33
929982215462768640	interdisciplinary	positive	2017-11-13 08:00:13
929970340570132481	interdisciplinary	positive	2017-11-13 07:13:01
964647490279571456	interdisciplinary	neutral	2018-02-16 23:47:38
964635770979016705	interdisciplinary	neutral	2018-02-16 23:01:04
964631601748389888	interdisciplinary	neutral	2018-02-16 22:44:30
964628249891373056	interdisciplinary	neutral	2018-02-16 22:31:11
964622920449478656	interdisciplinary	neutral	2018-02-16 22:10:00
964622511928311808	interdisciplinary	positive	2018-02-16 22:08:23
964621752461643776	interdisciplinary	positive	2018-02-16 22:05:22
964617879969701888	interdisciplinary	neutral	2018-02-16 21:49:58
964615798898790400	interdisciplinary	neutral	2018-02-16 21:41:42
964611503272820736	interdisciplinary	neutral	2018-02-16 21:24:38
964607975707955200	interdisciplinary	neutral	2018-02-16 21:10:37
964607857407774722	interdisciplinary	neutral	2018-02-16 21:10:09
964606480203776001	interdisciplinary	positive	2018-02-16 21:04:41
964605460610510850	interdisciplinary	neutral	2018-02-16 21:00:37
964603213314961408	interdisciplinary	neutral	2018-02-16 20:51:42
964601131799281664	interdisciplinary	positive	2018-02-16 20:43:25
964600620324933632	interdisciplinary	neutral	2018-02-16 20:41:23
964598474099408896	interdisciplinary	neutral	2018-02-16 20:32:52
964597495711043586	interdisciplinary	positive	2018-02-16 20:28:58
964594735578079232	interdisciplinary	positive	2018-02-16 20:18:00
964592180688953344	interdisciplinary	positive	2018-02-16 20:07:51
964590718227542017	interdisciplinary	positive	2018-02-16 20:02:03
964590571200438276	interdisciplinary	neutral	2018-02-16 20:01:28
964590030122569728	interdisciplinary	neutral	2018-02-16 19:59:19
964587713780420609	interdisciplinary	neutral	2018-02-16 19:50:06
964587705903480834	interdisciplinary	positive	2018-02-16 19:50:04
964585803673370624	interdisciplinary	neutral	2018-02-16 19:42:31
964582693324419072	interdisciplinary	neutral	2018-02-16 19:30:09
964581172910219265	interdisciplinary	neutral	2018-02-16 19:24:07
964579022410629120	interdisciplinary	positive	2018-02-16 19:15:34
964578971018059776	interdisciplinary	neutral	2018-02-16 19:15:22
964578883763949568	interdisciplinary	neutral	2018-02-16 19:15:01
964575185457287168	interdisciplinary	positive	2018-02-16 19:00:19
964574147757174784	interdisciplinary	positive	2018-02-16 18:56:12
964568959927357440	interdisciplinary	neutral	2018-02-16 18:35:35
964568309516591104	interdisciplinary	neutral	2018-02-16 18:33:00
964564340102676480	interdisciplinary	neutral	2018-02-16 18:17:14
964563780658171904	interdisciplinary	neutral	2018-02-16 18:15:00
964562004257230848	interdisciplinary	positive	2018-02-16 18:07:57
964557434147753985	interdisciplinary	positive	2018-02-16 17:49:47
964557229482528768	interdisciplinary	positive	2018-02-16 17:48:58
964554724400943105	interdisciplinary	neutral	2018-02-16 17:39:01
964554320757841925	interdisciplinary	positive	2018-02-16 17:37:25
964552620382748673	interdisciplinary	neutral	2018-02-16 17:30:39
964551217149079553	interdisciplinary	positive	2018-02-16 17:25:05
964550716537925632	interdisciplinary	neutral	2018-02-16 17:23:05
964550551269793793	interdisciplinary	positive	2018-02-16 17:22:26
964548167986438144	interdisciplinary	neutral	2018-02-16 17:12:58
964546189734662144	interdisciplinary	neutral	2018-02-16 17:05:06
964546185032818689	interdisciplinary	neutral	2018-02-16 17:05:05
964545595565330432	interdisciplinary	positive	2018-02-16 17:02:45
964545513608695810	interdisciplinary	positive	2018-02-16 17:02:25
964544916713017344	interdisciplinary	neutral	2018-02-16 17:00:03
964542670403198976	interdisciplinary	positive	2018-02-16 16:51:07
964540990114627584	interdisciplinary	positive	2018-02-16 16:44:27
964540791753465856	interdisciplinary	neutral	2018-02-16 16:43:39
964539348434767872	interdisciplinary	neutral	2018-02-16 16:37:55
964536137795670017	interdisciplinary	positive	2018-02-16 16:25:10
964536127968423941	interdisciplinary	neutral	2018-02-16 16:25:07
964536117423943680	interdisciplinary	neutral	2018-02-16 16:25:05
964534533449289728	interdisciplinary	positive	2018-02-16 16:18:47
964529870079488001	interdisciplinary	neutral	2018-02-16 16:00:15
964529824005050368	interdisciplinary	neutral	2018-02-16 16:00:04
964529329072898048	interdisciplinary	neutral	2018-02-16 15:58:06
964528157457113088	interdisciplinary	positive	2018-02-16 15:53:27
964528069296967680	interdisciplinary	positive	2018-02-16 15:53:06
964527066443116544	interdisciplinary	positive	2018-02-16 15:49:07
964526631225298945	interdisciplinary	positive	2018-02-16 15:47:23
964526080118927361	interdisciplinary	neutral	2018-02-16 15:45:12
964519353545887744	interdisciplinary	positive	2018-02-16 15:18:28
964518565687840768	interdisciplinary	neutral	2018-02-16 15:15:20
964518036484100101	interdisciplinary	neutral	2018-02-16 15:13:14
964517045936295938	interdisciplinary	positive	2018-02-16 15:09:18
964514574161600514	interdisciplinary	positive	2018-02-16 14:59:28
964513228628938753	interdisciplinary	neutral	2018-02-16 14:54:08
964513173184315392	interdisciplinary	neutral	2018-02-16 14:53:54
964512411368730624	interdisciplinary	neutral	2018-02-16 14:50:53
964511876892823555	interdisciplinary	neutral	2018-02-16 14:48:45
964509956471951361	interdisciplinary	positive	2018-02-16 14:41:08
964508814451101696	interdisciplinary	neutral	2018-02-16 14:36:35
964507896003354625	interdisciplinary	negative	2018-02-16 14:32:56
964507835689140224	interdisciplinary	neutral	2018-02-16 14:32:42
964507659868106752	interdisciplinary	neutral	2018-02-16 14:32:00
964507172049702914	interdisciplinary	neutral	2018-02-16 14:30:04
964505899917299713	interdisciplinary	neutral	2018-02-16 14:25:00
964504648861343745	interdisciplinary	positive	2018-02-16 14:20:02
964504070231941120	interdisciplinary	neutral	2018-02-16 14:17:44
964503498799886337	interdisciplinary	neutral	2018-02-16 14:15:28
964503360933171200	interdisciplinary	neutral	2018-02-16 14:14:55
964503070146269184	interdisciplinary	neutral	2018-02-16 14:13:46
964501007102369793	interdisciplinary	positive	2018-02-16 14:05:34
964500584341622784	interdisciplinary	neutral	2018-02-16 14:03:53
964498723148566528	interdisciplinary	neutral	2018-02-16 13:56:29
964496336182808576	interdisciplinary	neutral	2018-02-16 13:47:00
964495910259408896	interdisciplinary	neutral	2018-02-16 13:45:19
964495674757799936	interdisciplinary	positive	2018-02-16 13:44:22
964494097594667009	interdisciplinary	positive	2018-02-16 13:38:06
964493137833062400	interdisciplinary	positive	2018-02-16 13:34:18
964491808645566465	interdisciplinary	neutral	2018-02-16 13:29:01
964489609747951616	interdisciplinary	neutral	2018-02-16 13:20:16
964487827663843328	interdisciplinary	neutral	2018-02-16 13:13:12
964486190643675136	interdisciplinary	positive	2018-02-16 13:06:41
964484832821743616	interdisciplinary	neutral	2018-02-16 13:01:18
964484474150031360	interdisciplinary	positive	2018-02-16 12:59:52
964479433347403777	interdisciplinary	positive	2018-02-16 12:39:50
964478194748477440	interdisciplinary	neutral	2018-02-16 12:34:55
964478128000241665	interdisciplinary	neutral	2018-02-16 12:34:39
964476542498820096	interdisciplinary	neutral	2018-02-16 12:28:21
964474335309303809	interdisciplinary	positive	2018-02-16 12:19:35
964471111256653825	interdisciplinary	neutral	2018-02-16 12:06:46
964469706747981825	interdisciplinary	neutral	2018-02-16 12:01:11
964467011228184576	interdisciplinary	positive	2018-02-16 11:50:29
964463322736332800	interdisciplinary	neutral	2018-02-16 11:35:49
964462101212418049	interdisciplinary	neutral	2018-02-16 11:30:58
964460592328249344	interdisciplinary	positive	2018-02-16 11:24:58
964456848152809478	interdisciplinary	positive	2018-02-16 11:10:05
964456433705279490	interdisciplinary	neutral	2018-02-16 11:08:27
964454967619870720	interdisciplinary	negative	2018-02-16 11:02:37
964454505004896256	interdisciplinary	positive	2018-02-16 11:00:47
964453427932815360	interdisciplinary	positive	2018-02-16 10:56:30
964452262524407808	interdisciplinary	neutral	2018-02-16 10:51:52
964449282387513345	interdisciplinary	neutral	2018-02-16 10:40:02
964448255475109888	interdisciplinary	positive	2018-02-16 10:35:57
964446999406956545	interdisciplinary	neutral	2018-02-16 10:30:57
964446949586894850	interdisciplinary	positive	2018-02-16 10:30:45
964445364605595648	interdisciplinary	positive	2018-02-16 10:24:28
964445256052805633	interdisciplinary	positive	2018-02-16 10:24:02
964443864881860608	interdisciplinary	positive	2018-02-16 10:18:30
964443830236975104	interdisciplinary	positive	2018-02-16 10:18:22
964442555780861952	interdisciplinary	positive	2018-02-16 10:13:18
964442550697422848	interdisciplinary	positive	2018-02-16 10:13:17
964441904883683328	interdisciplinary	neutral	2018-02-16 10:10:43
964441319425871872	interdisciplinary	neutral	2018-02-16 10:08:23
964440367901937664	interdisciplinary	positive	2018-02-16 10:04:36
964439101645709312	interdisciplinary	positive	2018-02-16 09:59:34
964436188625956866	interdisciplinary	neutral	2018-02-16 09:48:00
964432824274010113	interdisciplinary	positive	2018-02-16 09:34:38
964429581364023297	interdisciplinary	neutral	2018-02-16 09:21:45
964428759192371203	interdisciplinary	positive	2018-02-16 09:18:29
964422071630442497	interdisciplinary	positive	2018-02-16 08:51:54
964419650749530112	interdisciplinary	neutral	2018-02-16 08:42:17
964418639494434816	interdisciplinary	neutral	2018-02-16 08:38:16
964413668594036736	interdisciplinary	neutral	2018-02-16 08:18:31
964408483520045061	interdisciplinary	neutral	2018-02-16 07:57:54
964400724040822784	interdisciplinary	neutral	2018-02-16 07:27:04
964384868196016128	interdisciplinary	positive	2018-02-16 06:24:04
964383778431934464	interdisciplinary	neutral	2018-02-16 06:19:44
964381579710640128	interdisciplinary	neutral	2018-02-16 06:11:00
964381534626111489	interdisciplinary	positive	2018-02-16 06:10:49
964380575543934976	interdisciplinary	neutral	2018-02-16 06:07:01
964378842432286720	interdisciplinary	positive	2018-02-16 06:00:07
964377109706625025	interdisciplinary	neutral	2018-02-16 05:53:14
964373148115222530	interdisciplinary	neutral	2018-02-16 05:37:30
964359670985981954	interdisciplinary	neutral	2018-02-16 04:43:57
964357785705054208	interdisciplinary	positive	2018-02-16 04:36:27
964343357840408576	interdisciplinary	positive	2018-02-16 03:39:07
964341773836447744	interdisciplinary	positive	2018-02-16 03:32:50
964335085066641408	interdisciplinary	positive	2018-02-16 03:06:15
964332176383803393	interdisciplinary	positive	2018-02-16 02:54:41
964331052528492544	interdisciplinary	positive	2018-02-16 02:50:13
964327634393092098	interdisciplinary	positive	2018-02-16 02:36:39
964324404665528320	interdisciplinary	neutral	2018-02-16 02:23:49
964323979858251776	interdisciplinary	positive	2018-02-16 02:22:07
964316351216193537	interdisciplinary	positive	2018-02-16 01:51:48
964314203904294913	interdisciplinary	neutral	2018-02-16 01:43:16
964314180038914048	interdisciplinary	neutral	2018-02-16 01:43:11
964313138559668229	interdisciplinary	neutral	2018-02-16 01:39:02
964306452109316097	interdisciplinary	positive	2018-02-16 01:12:28
964303451076382726	interdisciplinary	neutral	2018-02-16 01:00:33
964295683871264769	interdisciplinary	neutral	2018-02-16 00:29:41
964293294862708736	interdisciplinary	neutral	2018-02-16 00:20:11
938557717517447173	interdisciplinary	positive	2017-12-06 23:56:12
938557495521320960	interdisciplinary	neutral	2017-12-06 23:55:19
938556764617936896	interdisciplinary	neutral	2017-12-06 23:52:24
938556320206282752	interdisciplinary	neutral	2017-12-06 23:50:38
938556144909537280	interdisciplinary	neutral	2017-12-06 23:49:57
938546714050465792	interdisciplinary	positive	2017-12-06 23:12:28
938544439735345153	interdisciplinary	positive	2017-12-06 23:03:26
938543813102063616	interdisciplinary	positive	2017-12-06 23:00:57
938543585900642305	interdisciplinary	neutral	2017-12-06 23:00:02
938541584013959168	interdisciplinary	positive	2017-12-06 22:52:05
938539812524507136	interdisciplinary	positive	2017-12-06 22:45:03
938539333635792896	interdisciplinary	positive	2017-12-06 22:43:09
938538424331628544	interdisciplinary	positive	2017-12-06 22:39:32
938535882214203392	interdisciplinary	positive	2017-12-06 22:29:26
938535269287915520	interdisciplinary	positive	2017-12-06 22:26:59
938534851845570561	interdisciplinary	positive	2017-12-06 22:25:20
938530255450574848	interdisciplinary	neutral	2017-12-06 22:07:04
938528327840813056	interdisciplinary	positive	2017-12-06 21:59:25
938526863416266752	interdisciplinary	positive	2017-12-06 21:53:35
938525730111213568	interdisciplinary	neutral	2017-12-06 21:49:05
938524290059849729	interdisciplinary	positive	2017-12-06 21:43:22
938521316482867200	interdisciplinary	positive	2017-12-06 21:31:33
938516154888474624	interdisciplinary	neutral	2017-12-06 21:11:02
938509482128281602	interdisciplinary	neutral	2017-12-06 20:44:31
938505975270649857	interdisciplinary	neutral	2017-12-06 20:30:35
938505878759706624	interdisciplinary	positive	2017-12-06 20:30:12
938505456485584898	interdisciplinary	positive	2017-12-06 20:28:32
938505169192484869	interdisciplinary	positive	2017-12-06 20:27:23
938504170000338944	interdisciplinary	neutral	2017-12-06 20:23:25
938503638238023680	interdisciplinary	neutral	2017-12-06 20:21:18
938502212938010624	interdisciplinary	positive	2017-12-06 20:15:38
938501047085039617	interdisciplinary	positive	2017-12-06 20:11:00
938500868890157056	interdisciplinary	positive	2017-12-06 20:10:18
938499041083756546	interdisciplinary	neutral	2017-12-06 20:03:02
938498918765223937	interdisciplinary	positive	2017-12-06 20:02:33
938498421920370689	interdisciplinary	positive	2017-12-06 20:00:34
938497245091115008	interdisciplinary	positive	2017-12-06 19:55:54
938494385427288064	interdisciplinary	positive	2017-12-06 19:44:32
938494275700117505	interdisciplinary	neutral	2017-12-06 19:44:06
938494022007574533	interdisciplinary	negative	2017-12-06 19:43:05
938493258694627328	interdisciplinary	neutral	2017-12-06 19:40:03
938492833757122561	interdisciplinary	negative	2017-12-06 19:38:22
938491430502391808	interdisciplinary	neutral	2017-12-06 19:32:48
938491360864239621	interdisciplinary	negative	2017-12-06 19:32:31
938490730196164611	interdisciplinary	neutral	2017-12-06 19:30:01
938490680606887936	interdisciplinary	neutral	2017-12-06 19:29:49
938490622620717056	interdisciplinary	neutral	2017-12-06 19:29:35
938486739710107648	interdisciplinary	neutral	2017-12-06 19:14:09
938483535287148546	interdisciplinary	neutral	2017-12-06 19:01:25
938482254673833984	interdisciplinary	positive	2017-12-06 18:56:20
938482065367900160	interdisciplinary	positive	2017-12-06 18:55:35
938480784117305345	interdisciplinary	positive	2017-12-06 18:50:29
938480145194725379	interdisciplinary	neutral	2017-12-06 18:47:57
938479556683378689	interdisciplinary	positive	2017-12-06 18:45:37
938479430103719937	interdisciplinary	neutral	2017-12-06 18:45:06
938477606902607877	interdisciplinary	positive	2017-12-06 18:37:52
938477216895324161	interdisciplinary	positive	2017-12-06 18:36:19
938474456674050048	interdisciplinary	negative	2017-12-06 18:25:21
938472132610265089	interdisciplinary	neutral	2017-12-06 18:16:07
938471948014587905	interdisciplinary	neutral	2017-12-06 18:15:23
938470881810108416	interdisciplinary	positive	2017-12-06 18:11:08
938468203474358272	interdisciplinary	positive	2017-12-06 18:00:30
938466334811283456	interdisciplinary	neutral	2017-12-06 17:53:04
938466173762654209	interdisciplinary	neutral	2017-12-06 17:52:26
938465199035768832	interdisciplinary	positive	2017-12-06 17:48:33
938465067032612865	interdisciplinary	neutral	2017-12-06 17:48:02
938464394480115712	interdisciplinary	neutral	2017-12-06 17:45:22
938464328411381760	interdisciplinary	neutral	2017-12-06 17:45:06
938461601665085441	interdisciplinary	positive	2017-12-06 17:34:16
938461265579651073	interdisciplinary	positive	2017-12-06 17:32:56
938459415685955585	interdisciplinary	neutral	2017-12-06 17:25:35
938459396694257665	interdisciplinary	positive	2017-12-06 17:25:30
938458191029039105	interdisciplinary	positive	2017-12-06 17:20:43
938457604904202240	interdisciplinary	neutral	2017-12-06 17:18:23
938457000345731072	interdisciplinary	neutral	2017-12-06 17:15:59
938455215786905601	interdisciplinary	neutral	2017-12-06 17:08:53
938454613333864451	interdisciplinary	positive	2017-12-06 17:06:30
938452840506380288	interdisciplinary	neutral	2017-12-06 16:59:27
938452423118675968	interdisciplinary	neutral	2017-12-06 16:57:47
938449632912400385	interdisciplinary	neutral	2017-12-06 16:46:42
938448759742181376	interdisciplinary	neutral	2017-12-06 16:43:14
938446630763794432	interdisciplinary	positive	2017-12-06 16:34:46
938446320867659778	interdisciplinary	positive	2017-12-06 16:33:33
938446214508503040	interdisciplinary	neutral	2017-12-06 16:33:07
938445589825679360	interdisciplinary	neutral	2017-12-06 16:30:38
938444723408265217	interdisciplinary	neutral	2017-12-06 16:27:12
938443817367363586	interdisciplinary	neutral	2017-12-06 16:23:36
938443248263155712	interdisciplinary	positive	2017-12-06 16:21:20
938442957891538945	interdisciplinary	neutral	2017-12-06 16:20:11
938442143751901185	interdisciplinary	positive	2017-12-06 16:16:57
938441186993475584	interdisciplinary	positive	2017-12-06 16:13:09
938440261662924801	interdisciplinary	positive	2017-12-06 16:09:28
938439917750845440	interdisciplinary	neutral	2017-12-06 16:08:06
938439717586178055	interdisciplinary	positive	2017-12-06 16:07:18
938438965496971264	interdisciplinary	positive	2017-12-06 16:04:19
938435172931915776	interdisciplinary	positive	2017-12-06 15:49:15
938433990826119168	interdisciplinary	neutral	2017-12-06 15:44:33
938430083815165952	interdisciplinary	neutral	2017-12-06 15:29:01
938429864494948353	interdisciplinary	neutral	2017-12-06 15:28:09
938427825476038656	interdisciplinary	neutral	2017-12-06 15:20:03
938426191186481152	interdisciplinary	neutral	2017-12-06 15:13:33
938426094482526214	interdisciplinary	neutral	2017-12-06 15:13:10
938425928497147904	interdisciplinary	positive	2017-12-06 15:12:31
938424633107406853	interdisciplinary	positive	2017-12-06 15:07:22
938423522635993089	interdisciplinary	negative	2017-12-06 15:02:57
938421995565436928	interdisciplinary	neutral	2017-12-06 14:56:53
938421229781995521	interdisciplinary	neutral	2017-12-06 14:53:50
938418839112638465	interdisciplinary	neutral	2017-12-06 14:44:20
938416830229729281	interdisciplinary	positive	2017-12-06 14:36:21
938415379084345344	interdisciplinary	positive	2017-12-06 14:30:35
938414710214492160	interdisciplinary	neutral	2017-12-06 14:27:56
938413671922970624	interdisciplinary	neutral	2017-12-06 14:23:48
938411783022243840	interdisciplinary	positive	2017-12-06 14:16:18
938411152832262145	interdisciplinary	positive	2017-12-06 14:13:48
938408103112044549	interdisciplinary	neutral	2017-12-06 14:01:41
938407689662504960	interdisciplinary	positive	2017-12-06 14:00:02
938406695486844930	interdisciplinary	positive	2017-12-06 13:56:05
938405994425700352	interdisciplinary	positive	2017-12-06 13:53:18
938402406844510209	interdisciplinary	neutral	2017-12-06 13:39:03
938401398252818433	interdisciplinary	neutral	2017-12-06 13:35:02
938396118408421377	interdisciplinary	neutral	2017-12-06 13:14:03
938395988959612928	interdisciplinary	positive	2017-12-06 13:13:32
938395241970671616	interdisciplinary	neutral	2017-12-06 13:10:34
938388269850603520	interdisciplinary	positive	2017-12-06 12:42:52
938387866870276096	interdisciplinary	neutral	2017-12-06 12:41:16
938387293378957313	interdisciplinary	positive	2017-12-06 12:38:59
938387206254874625	interdisciplinary	neutral	2017-12-06 12:38:39
938386975987343360	interdisciplinary	neutral	2017-12-06 12:37:44
938385754186829824	interdisciplinary	positive	2017-12-06 12:32:52
938384309597229056	interdisciplinary	neutral	2017-12-06 12:27:08
938382556940161024	interdisciplinary	positive	2017-12-06 12:20:10
938382464187355137	interdisciplinary	neutral	2017-12-06 12:19:48
938378081462640640	interdisciplinary	neutral	2017-12-06 12:02:23
938377591035228160	interdisciplinary	neutral	2017-12-06 12:00:26
938376768767045632	interdisciplinary	positive	2017-12-06 11:57:10
938375129171681281	interdisciplinary	neutral	2017-12-06 11:50:39
938374140477796352	interdisciplinary	neutral	2017-12-06 11:46:43
938372380958908416	interdisciplinary	neutral	2017-12-06 11:39:44
938369059590213633	interdisciplinary	neutral	2017-12-06 11:26:32
938365078289739776	interdisciplinary	positive	2017-12-06 11:10:43
938363002818097152	interdisciplinary	positive	2017-12-06 11:02:28
938361896926932997	interdisciplinary	neutral	2017-12-06 10:58:04
938358103434809344	interdisciplinary	neutral	2017-12-06 10:43:00
938350964679036928	interdisciplinary	neutral	2017-12-06 10:14:38
938350003537539072	interdisciplinary	neutral	2017-12-06 10:10:49
938349552930902018	interdisciplinary	neutral	2017-12-06 10:09:01
938347454914850816	interdisciplinary	neutral	2017-12-06 10:00:41
938347292314046465	interdisciplinary	neutral	2017-12-06 10:00:02
938347283606773760	interdisciplinary	neutral	2017-12-06 10:00:00
938339683960049664	interdisciplinary	positive	2017-12-06 09:29:48
938339380741025793	interdisciplinary	positive	2017-12-06 09:28:36
938336692137639937	interdisciplinary	neutral	2017-12-06 09:17:55
938333067651043328	interdisciplinary	positive	2017-12-06 09:03:31
938326054548201472	interdisciplinary	positive	2017-12-06 08:35:39
938324985587929088	interdisciplinary	positive	2017-12-06 08:31:24
938312355787788289	interdisciplinary	positive	2017-12-06 07:41:13
938312348061880320	interdisciplinary	positive	2017-12-06 07:41:11
938311733030072322	interdisciplinary	neutral	2017-12-06 07:38:44
938309536204521472	interdisciplinary	positive	2017-12-06 07:30:01
938297317278535680	interdisciplinary	positive	2017-12-06 06:41:27
938287498568007682	interdisciplinary	neutral	2017-12-06 06:02:26
938286620184383488	interdisciplinary	positive	2017-12-06 05:58:57
938268919655206912	interdisciplinary	positive	2017-12-06 04:48:37
938244971806695424	interdisciplinary	positive	2017-12-06 03:13:27
938240580189949952	interdisciplinary	neutral	2017-12-06 02:56:00
938223617241907207	interdisciplinary	positive	2017-12-06 01:48:36
938222715563073536	interdisciplinary	neutral	2017-12-06 01:45:01
938220701248454656	interdisciplinary	neutral	2017-12-06 01:37:01
938219247045668864	interdisciplinary	neutral	2017-12-06 01:31:14
938216586011463685	interdisciplinary	neutral	2017-12-06 01:20:39
938215793682128896	interdisciplinary	positive	2017-12-06 01:17:31
938215634156052480	interdisciplinary	neutral	2017-12-06 01:16:53
938211552485928960	interdisciplinary	positive	2017-12-06 01:00:39
938210468723691520	interdisciplinary	positive	2017-12-06 00:56:21
938202264547627008	interdisciplinary	positive	2017-12-06 00:23:45
938199990220050432	interdisciplinary	positive	2017-12-06 00:14:43
938199273191198720	interdisciplinary	positive	2017-12-06 00:11:52
900711151314587648	interdisciplinary	neutral	2017-08-24 13:27:27
900709326784000001	interdisciplinary	positive	2017-08-24 13:20:12
900709109468717056	interdisciplinary	neutral	2017-08-24 13:19:20
900705614485225472	interdisciplinary	positive	2017-08-24 13:05:27
900705544633294852	interdisciplinary	neutral	2017-08-24 13:05:10
900703780588617732	interdisciplinary	positive	2017-08-24 12:58:10
900702903555551233	interdisciplinary	neutral	2017-08-24 12:54:41
900701799988039680	interdisciplinary	neutral	2017-08-24 12:50:18
900699378058506245	interdisciplinary	neutral	2017-08-24 12:40:40
900698156056412161	interdisciplinary	positive	2017-08-24 12:35:49
900696004533657601	interdisciplinary	positive	2017-08-24 12:27:16
900694700348362752	interdisciplinary	positive	2017-08-24 12:22:05
900692851734052864	interdisciplinary	positive	2017-08-24 12:14:44
900690111318417409	interdisciplinary	neutral	2017-08-24 12:03:51
900689149979709442	interdisciplinary	neutral	2017-08-24 12:00:02
900687281027153920	interdisciplinary	neutral	2017-08-24 11:52:36
900685408924831744	interdisciplinary	positive	2017-08-24 11:45:10
900685321888772096	interdisciplinary	negative	2017-08-24 11:44:49
900685062001352704	interdisciplinary	neutral	2017-08-24 11:43:47
900682898680008706	interdisciplinary	neutral	2017-08-24 11:35:11
900680840333733888	interdisciplinary	neutral	2017-08-24 11:27:00
900677161161555969	interdisciplinary	neutral	2017-08-24 11:12:23
900676878616469505	interdisciplinary	positive	2017-08-24 11:11:16
900671514000936960	interdisciplinary	positive	2017-08-24 10:49:57
900668006321319937	interdisciplinary	positive	2017-08-24 10:36:00
950879538417823744	interdisciplinary	positive	2018-01-09 23:58:43
950873816892432385	interdisciplinary	neutral	2018-01-09 23:35:58
950868501434048512	interdisciplinary	positive	2018-01-09 23:14:51
950862661314543616	interdisciplinary	positive	2018-01-09 22:51:39
950860596525846529	interdisciplinary	positive	2018-01-09 22:43:27
950855767980150785	interdisciplinary	positive	2018-01-09 22:24:15
950849614047006721	interdisciplinary	positive	2018-01-09 21:59:48
950848872561233920	interdisciplinary	neutral	2018-01-09 21:56:51
950846899245993984	interdisciplinary	negative	2018-01-09 21:49:01
950844562897014784	interdisciplinary	neutral	2018-01-09 21:39:44
950844346215141376	interdisciplinary	positive	2018-01-09 21:38:52
950844338518491136	interdisciplinary	positive	2018-01-09 21:38:50
950843245919113216	interdisciplinary	positive	2018-01-09 21:34:30
950843051798392834	interdisciplinary	positive	2018-01-09 21:33:44
950841092680896512	interdisciplinary	positive	2018-01-09 21:25:56
950840910182604800	interdisciplinary	neutral	2018-01-09 21:25:13
950839732392660993	interdisciplinary	positive	2018-01-09 21:20:32
950837999482241024	interdisciplinary	positive	2018-01-09 21:13:39
950834569338433536	interdisciplinary	neutral	2018-01-09 21:00:01
950833625632792576	interdisciplinary	neutral	2018-01-09 20:56:16
950832299796463616	interdisciplinary	neutral	2018-01-09 20:51:00
950832116383846400	interdisciplinary	neutral	2018-01-09 20:50:16
950828972572598273	interdisciplinary	neutral	2018-01-09 20:37:47
950826289367273473	interdisciplinary	positive	2018-01-09 20:27:07
950825632266702848	interdisciplinary	neutral	2018-01-09 20:24:30
950824469119098882	interdisciplinary	neutral	2018-01-09 20:19:53
950824098686537728	interdisciplinary	positive	2018-01-09 20:18:25
950819050526973952	interdisciplinary	neutral	2018-01-09 19:58:21
950818658300977152	interdisciplinary	neutral	2018-01-09 19:56:48
950812954865295360	interdisciplinary	negative	2018-01-09 19:34:08
950811710239145984	interdisciplinary	neutral	2018-01-09 19:29:11
950810963724382208	interdisciplinary	neutral	2018-01-09 19:26:13
950809571165200384	interdisciplinary	positive	2018-01-09 19:20:41
950809126661074944	interdisciplinary	positive	2018-01-09 19:18:55
950809051306319872	interdisciplinary	neutral	2018-01-09 19:18:37
950808212617547777	interdisciplinary	positive	2018-01-09 19:15:17
950808140211142656	interdisciplinary	neutral	2018-01-09 19:15:00
950807823788716032	interdisciplinary	neutral	2018-01-09 19:13:45
950807703760203776	interdisciplinary	positive	2018-01-09 19:13:16
950802067551113216	interdisciplinary	positive	2018-01-09 18:50:52
950801154140643328	interdisciplinary	neutral	2018-01-09 18:47:14
950800302562824192	interdisciplinary	neutral	2018-01-09 18:43:51
950795203593560064	interdisciplinary	positive	2018-01-09 18:23:36
950791531069431808	interdisciplinary	neutral	2018-01-09 18:09:00
950791285031555074	interdisciplinary	neutral	2018-01-09 18:08:01
950789898054832128	interdisciplinary	neutral	2018-01-09 18:02:31
950788251085778944	interdisciplinary	neutral	2018-01-09 17:55:58
950788012077613056	interdisciplinary	neutral	2018-01-09 17:55:01
950787490633437184	interdisciplinary	positive	2018-01-09 17:52:57
950787388510523392	interdisciplinary	neutral	2018-01-09 17:52:32
950784300680593408	interdisciplinary	neutral	2018-01-09 17:40:16
950781766826119170	interdisciplinary	neutral	2018-01-09 17:30:12
950779780714172417	interdisciplinary	positive	2018-01-09 17:22:19
950775399524560896	interdisciplinary	neutral	2018-01-09 17:04:54
950775232587026432	interdisciplinary	neutral	2018-01-09 17:04:14
950771029151903745	interdisciplinary	positive	2018-01-09 16:47:32
950770923648544768	interdisciplinary	neutral	2018-01-09 16:47:07
950770394654478337	interdisciplinary	neutral	2018-01-09 16:45:01
950769908811468805	interdisciplinary	neutral	2018-01-09 16:43:05
950768829449240578	interdisciplinary	neutral	2018-01-09 16:38:48
950768052034994183	interdisciplinary	positive	2018-01-09 16:35:42
950768002559086592	interdisciplinary	neutral	2018-01-09 16:35:30
950766679264505857	interdisciplinary	neutral	2018-01-09 16:30:15
950766639632605184	interdisciplinary	positive	2018-01-09 16:30:05
950764413111345152	interdisciplinary	positive	2018-01-09 16:21:15
950762874527461376	interdisciplinary	neutral	2018-01-09 16:15:08
950758641048670208	interdisciplinary	positive	2018-01-09 15:58:18
950756762344239104	interdisciplinary	positive	2018-01-09 15:50:51
950755701781094400	interdisciplinary	positive	2018-01-09 15:46:38
950755033116704769	interdisciplinary	neutral	2018-01-09 15:43:58
950752427178975236	interdisciplinary	neutral	2018-01-09 15:33:37
950750807586230272	interdisciplinary	neutral	2018-01-09 15:27:11
950749512880050176	interdisciplinary	neutral	2018-01-09 15:22:02
950749059173769216	interdisciplinary	neutral	2018-01-09 15:20:14
950748728264216577	interdisciplinary	neutral	2018-01-09 15:18:55
950747838023168001	interdisciplinary	neutral	2018-01-09 15:15:23
950745282790285312	interdisciplinary	neutral	2018-01-09 15:05:14
950745270127595520	interdisciplinary	neutral	2018-01-09 15:05:11
950743976461533184	interdisciplinary	neutral	2018-01-09 15:00:02
950740609463185410	interdisciplinary	neutral	2018-01-09 14:46:39
950740452608749569	interdisciplinary	neutral	2018-01-09 14:46:02
950739033109532672	interdisciplinary	neutral	2018-01-09 14:40:24
950736869406408704	interdisciplinary	neutral	2018-01-09 14:31:48
950736346481659905	interdisciplinary	neutral	2018-01-09 14:29:43
950735781689266176	interdisciplinary	positive	2018-01-09 14:27:28
950735564944367616	interdisciplinary	negative	2018-01-09 14:26:37
950734808291971072	interdisciplinary	neutral	2018-01-09 14:23:36
950732605326090240	interdisciplinary	neutral	2018-01-09 14:14:51
950731978713608192	interdisciplinary	positive	2018-01-09 14:12:22
950731709309386752	interdisciplinary	neutral	2018-01-09 14:11:17
950731038342418432	interdisciplinary	neutral	2018-01-09 14:08:37
950730620191363073	interdisciplinary	neutral	2018-01-09 14:06:58
950728891592617989	interdisciplinary	neutral	2018-01-09 14:00:06
950728844654280706	interdisciplinary	neutral	2018-01-09 13:59:54
950724208061009920	interdisciplinary	neutral	2018-01-09 13:41:29
950719973315481600	interdisciplinary	positive	2018-01-09 13:24:39
950719323630432257	interdisciplinary	neutral	2018-01-09 13:22:04
950712560415784961	interdisciplinary	positive	2018-01-09 12:55:12
950711499529465856	interdisciplinary	positive	2018-01-09 12:50:59
950710365616140290	interdisciplinary	neutral	2018-01-09 12:46:29
950709987357081600	interdisciplinary	positive	2018-01-09 12:44:58
950709202749566977	interdisciplinary	neutral	2018-01-09 12:41:51
950706498363158528	interdisciplinary	positive	2018-01-09 12:31:07
950705832664104960	interdisciplinary	neutral	2018-01-09 12:28:28
950700251651952640	interdisciplinary	positive	2018-01-09 12:06:17
950698024271073280	interdisciplinary	positive	2018-01-09 11:57:26
950693815479873537	interdisciplinary	neutral	2018-01-09 11:40:43
950692255744118784	interdisciplinary	neutral	2018-01-09 11:34:31
950687151968083968	interdisciplinary	positive	2018-01-09 11:14:14
950685656958693376	interdisciplinary	neutral	2018-01-09 11:08:18
950685001691156480	interdisciplinary	positive	2018-01-09 11:05:41
950681999135604736	interdisciplinary	neutral	2018-01-09 10:53:46
950681368073244672	interdisciplinary	neutral	2018-01-09 10:51:15
950676586214428672	interdisciplinary	neutral	2018-01-09 10:32:15
950675213829705728	interdisciplinary	neutral	2018-01-09 10:26:48
950673924131467264	interdisciplinary	neutral	2018-01-09 10:21:40
950673508606074881	interdisciplinary	positive	2018-01-09 10:20:01
950668930292609024	interdisciplinary	neutral	2018-01-09 10:01:50
950668561265188864	interdisciplinary	positive	2018-01-09 10:00:22
950666809161678848	interdisciplinary	neutral	2018-01-09 09:53:24
950665292648189952	interdisciplinary	positive	2018-01-09 09:47:22
950665281231294464	interdisciplinary	positive	2018-01-09 09:47:20
950659688382828545	interdisciplinary	neutral	2018-01-09 09:25:06
950653377029005312	interdisciplinary	neutral	2018-01-09 09:00:02
950652816619655168	interdisciplinary	positive	2018-01-09 08:57:48
950652560754475008	interdisciplinary	neutral	2018-01-09 08:56:47
950651389256130560	interdisciplinary	neutral	2018-01-09 08:52:08
950649362677485568	interdisciplinary	positive	2018-01-09 08:44:04
950618704785657857	interdisciplinary	neutral	2018-01-09 06:42:15
950614651443798019	interdisciplinary	positive	2018-01-09 06:26:09
950591736853749760	interdisciplinary	neutral	2018-01-09 04:55:05
950574822370758657	interdisciplinary	neutral	2018-01-09 03:47:53
950573400673591296	interdisciplinary	neutral	2018-01-09 03:42:14
950567842029719552	interdisciplinary	neutral	2018-01-09 03:20:08
950566288962834433	interdisciplinary	positive	2018-01-09 03:13:58
950559869156782081	interdisciplinary	neutral	2018-01-09 02:48:28
950550840359641088	interdisciplinary	neutral	2018-01-09 02:12:35
950547627484987393	interdisciplinary	positive	2018-01-09 01:59:49
950545417455964160	interdisciplinary	neutral	2018-01-09 01:51:02
950544863728144385	interdisciplinary	positive	2018-01-09 01:48:50
950540927789142016	interdisciplinary	negative	2018-01-09 01:33:12
950536349362237440	interdisciplinary	neutral	2018-01-09 01:15:00
950535556596948992	interdisciplinary	positive	2018-01-09 01:11:51
950534136829157376	interdisciplinary	positive	2018-01-09 01:06:12
950532703274676224	interdisciplinary	neutral	2018-01-09 01:00:31
950529283864367104	interdisciplinary	neutral	2018-01-09 00:46:55
950524073750052865	interdisciplinary	neutral	2018-01-09 00:26:13
950520774808473603	interdisciplinary	positive	2018-01-09 00:13:07
948703899824910336	interdisciplinary	neutral	2018-01-03 23:53:30
948703829268291585	interdisciplinary	positive	2018-01-03 23:53:13
948698061961924610	interdisciplinary	neutral	2018-01-03 23:30:18
948693753866473473	interdisciplinary	positive	2018-01-03 23:13:11
948692953060425728	interdisciplinary	neutral	2018-01-03 23:10:00
948691317097484288	interdisciplinary	negative	2018-01-03 23:03:30
948690494099542016	interdisciplinary	neutral	2018-01-03 23:00:14
948686536673021953	interdisciplinary	positive	2018-01-03 22:44:30
948682971145490433	interdisciplinary	neutral	2018-01-03 22:30:20
948682928070057984	interdisciplinary	positive	2018-01-03 22:30:10
948680677326835712	interdisciplinary	neutral	2018-01-03 22:21:13
948676846983483392	interdisciplinary	neutral	2018-01-03 22:06:00
948676148770299904	interdisciplinary	neutral	2018-01-03 22:03:14
948674987887652869	interdisciplinary	positive	2018-01-03 21:58:37
948674635243044864	interdisciplinary	positive	2018-01-03 21:57:13
948661436418592770	interdisciplinary	neutral	2018-01-03 21:04:46
948660250370105350	interdisciplinary	neutral	2018-01-03 21:00:03
948658284805881857	interdisciplinary	positive	2018-01-03 20:52:14
948656965479264256	interdisciplinary	neutral	2018-01-03 20:47:00
948656121501405186	interdisciplinary	neutral	2018-01-03 20:43:39
948655079497846785	interdisciplinary	positive	2018-01-03 20:39:30
948654276343222277	interdisciplinary	neutral	2018-01-03 20:36:19
948652474394599424	interdisciplinary	neutral	2018-01-03 20:29:09
948645881531785216	interdisciplinary	positive	2018-01-03 20:02:57
948645386410864640	interdisciplinary	positive	2018-01-03 20:00:59
948636296611803137	interdisciplinary	negative	2018-01-03 19:24:52
948635213797707777	interdisciplinary	negative	2018-01-03 19:20:34
948632577308549120	interdisciplinary	neutral	2018-01-03 19:10:05
948624554318065664	interdisciplinary	positive	2018-01-03 18:38:12
948619751441379328	interdisciplinary	positive	2018-01-03 18:19:07
948618264233394176	interdisciplinary	neutral	2018-01-03 18:13:13
948616107715375105	interdisciplinary	positive	2018-01-03 18:04:39
948612260691365889	interdisciplinary	positive	2018-01-03 17:49:21
948607554543869953	interdisciplinary	neutral	2018-01-03 17:30:39
948607392471797760	interdisciplinary	positive	2018-01-03 17:30:01
948605880337162240	interdisciplinary	neutral	2018-01-03 17:24:00
948600672538251266	interdisciplinary	positive	2018-01-03 17:03:19
948599252342726656	interdisciplinary	positive	2018-01-03 16:57:40
948599093428965378	interdisciplinary	neutral	2018-01-03 16:57:02
948598239934103552	interdisciplinary	positive	2018-01-03 16:53:39
948595358329982976	interdisciplinary	neutral	2018-01-03 16:42:12
948591043800428545	interdisciplinary	neutral	2018-01-03 16:25:03
948590590048063488	interdisciplinary	neutral	2018-01-03 16:23:15
948590303623237633	interdisciplinary	positive	2018-01-03 16:22:06
948590266411347968	interdisciplinary	neutral	2018-01-03 16:21:58
948589668878217217	interdisciplinary	neutral	2018-01-03 16:19:35
948589402095316993	interdisciplinary	neutral	2018-01-03 16:18:32
948587134985883650	interdisciplinary	positive	2018-01-03 16:09:31
948586023939989505	interdisciplinary	positive	2018-01-03 16:05:06
948584236969324549	interdisciplinary	neutral	2018-01-03 15:58:00
948574359823646720	interdisciplinary	neutral	2018-01-03 15:18:45
948569241342676992	interdisciplinary	neutral	2018-01-03 14:58:25
948568273209188352	interdisciplinary	neutral	2018-01-03 14:54:34
948568152195018754	interdisciplinary	positive	2018-01-03 14:54:05
948567109105143808	interdisciplinary	neutral	2018-01-03 14:49:56
948566143207436288	interdisciplinary	positive	2018-01-03 14:46:06
948564780561944578	interdisciplinary	positive	2018-01-03 14:40:41
948561344315367429	interdisciplinary	neutral	2018-01-03 14:27:02
948558665539293184	interdisciplinary	positive	2018-01-03 14:16:23
948553570097487873	interdisciplinary	positive	2018-01-03 13:56:09
948550312113180672	interdisciplinary	positive	2018-01-03 13:43:12
948549555540447233	interdisciplinary	neutral	2018-01-03 13:40:11
948543721057996800	interdisciplinary	negative	2018-01-03 13:17:00
948540448510898176	interdisciplinary	neutral	2018-01-03 13:04:00
948536422826422272	interdisciplinary	neutral	2018-01-03 12:48:00
948529857184632832	interdisciplinary	neutral	2018-01-03 12:21:55
948523433859731457	interdisciplinary	positive	2018-01-03 11:56:24
948523202854244352	interdisciplinary	neutral	2018-01-03 11:55:28
948522874943496192	interdisciplinary	positive	2018-01-03 11:54:10
948522824267911168	interdisciplinary	positive	2018-01-03 11:53:58
948522410109734912	interdisciplinary	positive	2018-01-03 11:52:19
948519973139435521	interdisciplinary	positive	2018-01-03 11:42:38
948513773500891136	interdisciplinary	neutral	2018-01-03 11:18:00
948509569357090816	interdisciplinary	positive	2018-01-03 11:01:18
948508107596009472	interdisciplinary	neutral	2018-01-03 10:55:29
948497185770962944	interdisciplinary	neutral	2018-01-03 10:12:05
948496866701922309	interdisciplinary	neutral	2018-01-03 10:10:49
948494184184500224	interdisciplinary	neutral	2018-01-03 10:00:10
948493891719909377	interdisciplinary	positive	2018-01-03 09:59:00
948490536758980608	interdisciplinary	positive	2018-01-03 09:45:40
948489624636346368	interdisciplinary	neutral	2018-01-03 09:42:03
948488155115806725	interdisciplinary	neutral	2018-01-03 09:36:12
948486354098360320	interdisciplinary	positive	2018-01-03 09:29:03
948483308387799041	interdisciplinary	neutral	2018-01-03 09:16:57
948472055829336064	interdisciplinary	neutral	2018-01-03 08:32:14
948471529095999488	interdisciplinary	positive	2018-01-03 08:30:08
948471477636083712	interdisciplinary	positive	2018-01-03 08:29:56
948469408078364678	interdisciplinary	positive	2018-01-03 08:21:43
948461659521200128	interdisciplinary	positive	2018-01-03 07:50:55
948454152182620160	interdisciplinary	positive	2018-01-03 07:21:05
948408847382691841	interdisciplinary	neutral	2018-01-03 04:21:04
948408577420677120	interdisciplinary	negative	2018-01-03 04:20:00
948394095654748160	interdisciplinary	positive	2018-01-03 03:22:27
948391756269223936	interdisciplinary	positive	2018-01-03 03:13:09
948390171472551941	interdisciplinary	positive	2018-01-03 03:06:51
948384751882293250	interdisciplinary	positive	2018-01-03 02:45:19
948376657890545664	interdisciplinary	neutral	2018-01-03 02:13:09
948352988640260096	interdisciplinary	neutral	2018-01-03 00:39:06
948347770439720960	interdisciplinary	positive	2018-01-03 00:18:22
948346881243013125	interdisciplinary	positive	2018-01-03 00:14:50
948346348977389568	interdisciplinary	neutral	2018-01-03 00:12:43
948345010432462848	interdisciplinary	positive	2018-01-03 00:07:24
948343152993161216	interdisciplinary	neutral	2018-01-03 00:00:01
952683845995950080	interdisciplinary	negative	2018-01-14 23:28:23
952678697546416128	interdisciplinary	neutral	2018-01-14 23:07:56
952673448429486080	interdisciplinary	neutral	2018-01-14 22:47:04
952665346120482816	interdisciplinary	neutral	2018-01-14 22:14:52
952661604859965440	interdisciplinary	neutral	2018-01-14 22:00:00
952660603365142528	interdisciplinary	neutral	2018-01-14 21:56:02
952659570140344320	interdisciplinary	positive	2018-01-14 21:51:55
952647781298196480	interdisciplinary	neutral	2018-01-14 21:05:05
952646251065106434	interdisciplinary	neutral	2018-01-14 20:59:00
952628841616461824	interdisciplinary	positive	2018-01-14 19:49:49
952623897853284352	interdisciplinary	neutral	2018-01-14 19:30:10
952623780618276865	interdisciplinary	positive	2018-01-14 19:29:42
952618036246310912	interdisciplinary	positive	2018-01-14 19:06:53
952592146858696704	interdisciplinary	neutral	2018-01-14 17:24:00
952582572852293638	interdisciplinary	positive	2018-01-14 16:45:58
952578293143887877	interdisciplinary	positive	2018-01-14 16:28:57
952577907465113603	interdisciplinary	positive	2018-01-14 16:27:25
952572791475392512	interdisciplinary	positive	2018-01-14 16:07:06
952571802189991938	interdisciplinary	neutral	2018-01-14 16:03:10
952567065390518273	interdisciplinary	positive	2018-01-14 15:44:20
952564043604217856	interdisciplinary	neutral	2018-01-14 15:32:20
952559189284581377	interdisciplinary	positive	2018-01-14 15:13:03
952552795634372610	interdisciplinary	positive	2018-01-14 14:47:38
952550002672447488	interdisciplinary	neutral	2018-01-14 14:36:32
952548139130654723	interdisciplinary	negative	2018-01-14 14:29:08
952546552995819520	interdisciplinary	positive	2018-01-14 14:22:50
952541880146972672	interdisciplinary	positive	2018-01-14 14:04:16
952534295591170048	interdisciplinary	positive	2018-01-14 13:34:07
952520774438432768	interdisciplinary	positive	2018-01-14 12:40:24
952510887532924929	interdisciplinary	positive	2018-01-14 12:01:07
952507543875670019	interdisciplinary	neutral	2018-01-14 11:47:49
952495818266873856	interdisciplinary	neutral	2018-01-14 11:01:14
952491297331470337	interdisciplinary	neutral	2018-01-14 10:43:16
952491270898880512	interdisciplinary	positive	2018-01-14 10:43:10
952482894739574785	interdisciplinary	neutral	2018-01-14 10:09:53
952482238389665792	interdisciplinary	neutral	2018-01-14 10:07:16
952478383421747202	interdisciplinary	positive	2018-01-14 09:51:57
952474881106546688	interdisciplinary	positive	2018-01-14 09:38:02
952465836794527744	interdisciplinary	neutral	2018-01-14 09:02:06
952448726475399168	interdisciplinary	neutral	2018-01-14 07:54:06
952444009082843136	interdisciplinary	neutral	2018-01-14 07:35:21
952439908953739264	interdisciplinary	neutral	2018-01-14 07:19:04
952423592645373953	interdisciplinary	positive	2018-01-14 06:14:14
952415344156692480	interdisciplinary	neutral	2018-01-14 05:41:27
933342356576681986	interdisciplinary	positive	2017-11-22 14:32:13
933341904011395072	interdisciplinary	neutral	2017-11-22 14:30:25
933341682682269697	interdisciplinary	positive	2017-11-22 14:29:32
933340820882755584	interdisciplinary	neutral	2017-11-22 14:26:06
933340467164565504	interdisciplinary	positive	2017-11-22 14:24:42
933339933124653057	interdisciplinary	neutral	2017-11-22 14:22:35
933338159605342208	interdisciplinary	neutral	2017-11-22 14:15:32
933335612152827904	interdisciplinary	neutral	2017-11-22 14:05:25
933335559484911616	interdisciplinary	neutral	2017-11-22 14:05:12
933334554466758658	interdisciplinary	neutral	2017-11-22 14:01:12
933334489643847681	interdisciplinary	neutral	2017-11-22 14:00:57
933334163641589760	interdisciplinary	neutral	2017-11-22 13:59:39
933328211399860229	interdisciplinary	neutral	2017-11-22 13:36:00
933326151858171905	interdisciplinary	positive	2017-11-22 13:27:49
933324909085851648	interdisciplinary	positive	2017-11-22 13:22:53
933323051357343744	interdisciplinary	positive	2017-11-22 13:15:30
933323004217647104	interdisciplinary	positive	2017-11-22 13:15:19
933316117963165697	interdisciplinary	positive	2017-11-22 12:47:57
933312218682351616	interdisciplinary	positive	2017-11-22 12:32:27
933309474537865217	interdisciplinary	neutral	2017-11-22 12:21:33
933307936692211713	interdisciplinary	neutral	2017-11-22 12:15:26
933307860091637760	interdisciplinary	positive	2017-11-22 12:15:08
933306960874823680	interdisciplinary	neutral	2017-11-22 12:11:34
933305815842385920	interdisciplinary	neutral	2017-11-22 12:07:01
933302783364796417	interdisciplinary	neutral	2017-11-22 11:54:58
933302475511287808	interdisciplinary	neutral	2017-11-22 11:53:44
933302239145463808	interdisciplinary	positive	2017-11-22 11:52:48
933302051626463232	interdisciplinary	neutral	2017-11-22 11:52:03
933299628598091777	interdisciplinary	positive	2017-11-22 11:42:25
933298794237702144	interdisciplinary	neutral	2017-11-22 11:39:07
933294651741794305	interdisciplinary	positive	2017-11-22 11:22:39
933290562362392577	interdisciplinary	positive	2017-11-22 11:06:24
933290211559305216	interdisciplinary	neutral	2017-11-22 11:05:00
933290135197757440	interdisciplinary	neutral	2017-11-22 11:04:42
933290002426953729	interdisciplinary	positive	2017-11-22 11:04:10
933289306122223616	interdisciplinary	positive	2017-11-22 11:01:24
933289070821720066	interdisciplinary	neutral	2017-11-22 11:00:28
933282697757171712	interdisciplinary	positive	2017-11-22 10:35:09
933280505201659904	interdisciplinary	positive	2017-11-22 10:26:26
933278381168300032	interdisciplinary	neutral	2017-11-22 10:18:00
933278157251244034	interdisciplinary	neutral	2017-11-22 10:17:06
933277674478301184	interdisciplinary	neutral	2017-11-22 10:15:11
933273490979020801	interdisciplinary	positive	2017-11-22 09:58:34
933268322530889728	interdisciplinary	positive	2017-11-22 09:38:02
933267858963992576	interdisciplinary	positive	2017-11-22 09:36:11
933267713757245447	interdisciplinary	positive	2017-11-22 09:35:36
933267171496681478	interdisciplinary	positive	2017-11-22 09:33:27
933266653797683200	interdisciplinary	neutral	2017-11-22 09:31:24
933264999874568192	interdisciplinary	positive	2017-11-22 09:24:49
933258742417694720	interdisciplinary	negative	2017-11-22 08:59:57
933254304080601088	interdisciplinary	positive	2017-11-22 08:42:19
933252770194366466	interdisciplinary	positive	2017-11-22 08:36:14
933245561100103680	interdisciplinary	neutral	2017-11-22 08:07:35
933245129191710721	interdisciplinary	positive	2017-11-22 08:05:52
933239905748107271	interdisciplinary	neutral	2017-11-22 07:45:06
933232330117873664	interdisciplinary	neutral	2017-11-22 07:15:00
933221879992557571	interdisciplinary	positive	2017-11-22 06:33:29
933189241487556608	interdisciplinary	positive	2017-11-22 04:23:47
933188817280012288	interdisciplinary	positive	2017-11-22 04:22:06
933186562728263680	interdisciplinary	positive	2017-11-22 04:13:08
933184843126489088	interdisciplinary	positive	2017-11-22 04:06:18
933179014113509376	interdisciplinary	neutral	2017-11-22 03:43:09
933173397890011136	interdisciplinary	positive	2017-11-22 03:20:50
933169215267266560	interdisciplinary	neutral	2017-11-22 03:04:13
933166950091440129	interdisciplinary	neutral	2017-11-22 02:55:12
933161466684891136	interdisciplinary	positive	2017-11-22 02:33:25
933159991174983681	interdisciplinary	neutral	2017-11-22 02:27:33
933155887446818816	interdisciplinary	positive	2017-11-22 02:11:15
933153216744828928	interdisciplinary	neutral	2017-11-22 02:00:38
933147636642795520	interdisciplinary	neutral	2017-11-22 01:38:28
933145507664420864	interdisciplinary	neutral	2017-11-22 01:30:00
933145353863303168	interdisciplinary	positive	2017-11-22 01:29:24
933141676821921792	interdisciplinary	neutral	2017-11-22 01:14:47
933138806777065472	interdisciplinary	positive	2017-11-22 01:03:23
933138024480854016	interdisciplinary	neutral	2017-11-22 01:00:16
933132531179950080	interdisciplinary	neutral	2017-11-22 00:38:26
933130021761191936	interdisciplinary	neutral	2017-11-22 00:28:28
933129578213601280	interdisciplinary	positive	2017-11-22 00:26:42
933128400029474816	interdisciplinary	positive	2017-11-22 00:22:01
933126167841800193	interdisciplinary	positive	2017-11-22 00:13:09
933116780972830720	interdisciplinary	neutral	2017-11-21 23:35:51
933116592837332992	interdisciplinary	neutral	2017-11-21 23:35:06
933113421209489409	interdisciplinary	neutral	2017-11-21 23:22:30
933108725900029953	interdisciplinary	neutral	2017-11-21 23:03:51
933107830793621504	interdisciplinary	neutral	2017-11-21 23:00:17
933107021611782144	interdisciplinary	positive	2017-11-21 22:57:04
933093869037559810	interdisciplinary	positive	2017-11-21 22:04:49
933090177844576259	interdisciplinary	positive	2017-11-21 21:50:09
933088489364738058	interdisciplinary	neutral	2017-11-21 21:43:26
933087164614578176	interdisciplinary	positive	2017-11-21 21:38:10
933086385053077504	interdisciplinary	positive	2017-11-21 21:35:04
933085943833210880	interdisciplinary	neutral	2017-11-21 21:33:19
933084703137005569	interdisciplinary	neutral	2017-11-21 21:28:23
933079600619548674	interdisciplinary	positive	2017-11-21 21:08:07
933073782952120320	interdisciplinary	neutral	2017-11-21 20:45:00
933073614919708672	interdisciplinary	positive	2017-11-21 20:44:20
933071145183608832	interdisciplinary	positive	2017-11-21 20:34:31
933065305970085888	interdisciplinary	positive	2017-11-21 20:11:19
933062550442463232	interdisciplinary	neutral	2017-11-21 20:00:22
933061940372414464	interdisciplinary	positive	2017-11-21 19:57:56
933058930552401920	interdisciplinary	neutral	2017-11-21 19:45:59
933058485104889857	interdisciplinary	neutral	2017-11-21 19:44:12
933057498122088448	interdisciplinary	positive	2017-11-21 19:40:17
933050382808485889	interdisciplinary	neutral	2017-11-21 19:12:01
933040798450552833	interdisciplinary	positive	2017-11-21 18:33:56
933038317133811713	interdisciplinary	positive	2017-11-21 18:24:04
933035810504564737	interdisciplinary	neutral	2017-11-21 18:14:06
933034205767925760	interdisciplinary	neutral	2017-11-21 18:07:44
933032483368718336	interdisciplinary	positive	2017-11-21 18:00:53
933029210796494848	interdisciplinary	neutral	2017-11-21 17:47:53
933029125194944513	interdisciplinary	positive	2017-11-21 17:47:32
933027809584386048	interdisciplinary	neutral	2017-11-21 17:42:19
933026030742327298	interdisciplinary	positive	2017-11-21 17:35:15
933024856102264832	interdisciplinary	neutral	2017-11-21 17:30:35
933024805380591617	interdisciplinary	neutral	2017-11-21 17:30:23
933024280023052294	interdisciplinary	neutral	2017-11-21 17:28:17
933023539136999426	interdisciplinary	neutral	2017-11-21 17:25:21
933022197857300480	interdisciplinary	positive	2017-11-21 17:20:01
933021591184855040	interdisciplinary	neutral	2017-11-21 17:17:36
933020659688640512	interdisciplinary	neutral	2017-11-21 17:13:54
933020137887862784	interdisciplinary	neutral	2017-11-21 17:11:50
933018741834629120	interdisciplinary	positive	2017-11-21 17:06:17
933017250570829825	interdisciplinary	neutral	2017-11-21 17:00:21
933017181402546176	interdisciplinary	neutral	2017-11-21 17:00:05
933017177057357826	interdisciplinary	neutral	2017-11-21 17:00:04
933015831038103553	interdisciplinary	positive	2017-11-21 16:54:43
933013456885829633	interdisciplinary	neutral	2017-11-21 16:45:17
933012616120848385	interdisciplinary	neutral	2017-11-21 16:41:56
933011301030391809	interdisciplinary	neutral	2017-11-21 16:36:43
933010921794007041	interdisciplinary	positive	2017-11-21 16:35:12
933007967464521728	interdisciplinary	positive	2017-11-21 16:23:28
933006804245733377	interdisciplinary	neutral	2017-11-21 16:18:51
933006156393525250	interdisciplinary	neutral	2017-11-21 16:16:16
933005352047665154	interdisciplinary	neutral	2017-11-21 16:13:04
933005108337659904	interdisciplinary	neutral	2017-11-21 16:12:06
933004825553522689	interdisciplinary	neutral	2017-11-21 16:10:59
933003597528403971	interdisciplinary	neutral	2017-11-21 16:06:06
933003178211270658	interdisciplinary	neutral	2017-11-21 16:04:26
933002461735981056	interdisciplinary	neutral	2017-11-21 16:01:35
933002336443748352	interdisciplinary	positive	2017-11-21 16:01:06
933001784334962688	interdisciplinary	positive	2017-11-21 15:58:54
933001503840854019	interdisciplinary	positive	2017-11-21 15:57:47
932999764391727104	interdisciplinary	positive	2017-11-21 15:50:52
932997557768335361	interdisciplinary	neutral	2017-11-21 15:42:06
932997185242894336	interdisciplinary	positive	2017-11-21 15:40:37
932995715026046983	interdisciplinary	positive	2017-11-21 15:34:47
932993547460063232	interdisciplinary	neutral	2017-11-21 15:26:10
932989779108605952	interdisciplinary	neutral	2017-11-21 15:11:12
932988866830749696	interdisciplinary	positive	2017-11-21 15:07:34
932988516576956423	interdisciplinary	neutral	2017-11-21 15:06:11
932987666899111936	interdisciplinary	positive	2017-11-21 15:02:48
932982945660497920	interdisciplinary	neutral	2017-11-21 14:44:02
932981419680419841	interdisciplinary	positive	2017-11-21 14:37:59
932981379750662144	interdisciplinary	neutral	2017-11-21 14:37:49
932980471276949504	interdisciplinary	neutral	2017-11-21 14:34:12
932979055573512192	interdisciplinary	positive	2017-11-21 14:28:35
932978284983472128	interdisciplinary	neutral	2017-11-21 14:25:31
932963769394827268	interdisciplinary	positive	2017-11-21 13:27:50
932963706186686464	interdisciplinary	positive	2017-11-21 13:27:35
932960308204920832	interdisciplinary	positive	2017-11-21 13:14:05
932956838974361600	interdisciplinary	neutral	2017-11-21 13:00:18
932954471952461825	interdisciplinary	neutral	2017-11-21 12:50:54
932953807880941569	interdisciplinary	neutral	2017-11-21 12:48:15
932952032599859200	interdisciplinary	neutral	2017-11-21 12:41:12
932949059844956160	interdisciplinary	neutral	2017-11-21 12:29:23
932947395788275712	interdisciplinary	positive	2017-11-21 12:22:47
932945023812997122	interdisciplinary	neutral	2017-11-21 12:13:21
932944989415526401	interdisciplinary	neutral	2017-11-21 12:13:13
932942490629476353	interdisciplinary	neutral	2017-11-21 12:03:17
932941402488627200	interdisciplinary	positive	2017-11-21 11:58:58
932941297685540864	interdisciplinary	positive	2017-11-21 11:58:33
932938734311440384	interdisciplinary	positive	2017-11-21 11:48:22
932938348053782528	interdisciplinary	positive	2017-11-21 11:46:49
932937715481563136	interdisciplinary	positive	2017-11-21 11:44:19
932935285410852867	interdisciplinary	neutral	2017-11-21 11:34:39
932933676622630912	interdisciplinary	positive	2017-11-21 11:28:16
932933243925561344	interdisciplinary	positive	2017-11-21 11:26:33
932933164372197376	interdisciplinary	neutral	2017-11-21 11:26:14
932931156911288320	interdisciplinary	neutral	2017-11-21 11:18:15
932930753914077185	interdisciplinary	positive	2017-11-21 11:16:39
932927851027927040	interdisciplinary	positive	2017-11-21 11:05:07
932926588081065984	interdisciplinary	neutral	2017-11-21 11:00:06
932924505747574784	interdisciplinary	neutral	2017-11-21 10:51:49
932923163008274432	interdisciplinary	positive	2017-11-21 10:46:29
932923135845945344	interdisciplinary	neutral	2017-11-21 10:46:23
932918460040011776	interdisciplinary	neutral	2017-11-21 10:27:48
932916196399353856	interdisciplinary	neutral	2017-11-21 10:18:48
932913956116721664	interdisciplinary	neutral	2017-11-21 10:09:54
932911471956250624	interdisciplinary	neutral	2017-11-21 10:00:02
932911119483760640	interdisciplinary	positive	2017-11-21 09:58:38
932910172384702464	interdisciplinary	positive	2017-11-21 09:54:52
932908544487251968	interdisciplinary	neutral	2017-11-21 09:48:24
932908325620023296	interdisciplinary	neutral	2017-11-21 09:47:32
932906312232562690	interdisciplinary	neutral	2017-11-21 09:39:32
932903816537804802	interdisciplinary	positive	2017-11-21 09:29:37
932884572324466688	interdisciplinary	neutral	2017-11-21 08:13:08
932877023848161280	interdisciplinary	positive	2017-11-21 07:43:09
932866914115772416	interdisciplinary	neutral	2017-11-21 07:02:58
932860633158225920	interdisciplinary	neutral	2017-11-21 06:38:01
932853405378334720	interdisciplinary	positive	2017-11-21 06:09:18
932849634267029504	interdisciplinary	neutral	2017-11-21 05:54:18
932838439019565058	interdisciplinary	negative	2017-11-21 05:09:49
932834492871569408	interdisciplinary	neutral	2017-11-21 04:54:08
932823127112941575	interdisciplinary	positive	2017-11-21 04:08:59
932804765070721024	interdisciplinary	neutral	2017-11-21 02:56:01
932789194069483520	interdisciplinary	positive	2017-11-21 01:54:08
932785851997843456	interdisciplinary	positive	2017-11-21 01:40:52
932784666842722304	interdisciplinary	positive	2017-11-21 01:36:09
932783419964166144	interdisciplinary	neutral	2017-11-21 01:31:12
932782584001478656	interdisciplinary	positive	2017-11-21 01:27:52
932775575378423808	interdisciplinary	neutral	2017-11-21 01:00:01
932767127035043840	interdisciplinary	positive	2017-11-21 00:26:27
932766780157825024	interdisciplinary	positive	2017-11-21 00:25:05
932764203282132992	interdisciplinary	positive	2017-11-21 00:14:50
932763822116495360	interdisciplinary	neutral	2017-11-21 00:13:19
932763491592794112	interdisciplinary	neutral	2017-11-21 00:12:00
932760479377666048	interdisciplinary	neutral	2017-11-21 00:00:02
932756733310717958	interdisciplinary	positive	2017-11-20 23:45:09
932755177928617985	interdisciplinary	positive	2017-11-20 23:38:58
932744602326626304	interdisciplinary	neutral	2017-11-20 22:56:57
932744532176748545	interdisciplinary	positive	2017-11-20 22:56:40
932743295662477312	interdisciplinary	positive	2017-11-20 22:51:45
932741451401781249	interdisciplinary	negative	2017-11-20 22:44:26
932737836612067328	interdisciplinary	positive	2017-11-20 22:30:04
932736761922453504	interdisciplinary	neutral	2017-11-20 22:25:48
932735218351423488	interdisciplinary	neutral	2017-11-20 22:19:40
932731730137673728	interdisciplinary	positive	2017-11-20 22:05:48
932730900940455938	interdisciplinary	positive	2017-11-20 22:02:30
932728268611993600	interdisciplinary	positive	2017-11-20 21:52:03
932727723805544449	interdisciplinary	positive	2017-11-20 21:49:53
932724082596073473	interdisciplinary	neutral	2017-11-20 21:35:25
932717954797572096	interdisciplinary	positive	2017-11-20 21:11:04
932709321003040768	interdisciplinary	neutral	2017-11-20 20:36:45
932704288081661953	interdisciplinary	neutral	2017-11-20 20:16:45
932703434293284867	interdisciplinary	neutral	2017-11-20 20:13:22
932702708636712961	interdisciplinary	positive	2017-11-20 20:10:29
932702070280372224	interdisciplinary	neutral	2017-11-20 20:07:56
932701986738327553	interdisciplinary	negative	2017-11-20 20:07:37
932698440026374146	interdisciplinary	neutral	2017-11-20 19:53:31
932697241306980353	interdisciplinary	positive	2017-11-20 19:48:45
932695100240646145	interdisciplinary	neutral	2017-11-20 19:40:15
932694759289901056	interdisciplinary	positive	2017-11-20 19:38:53
932694680113905665	interdisciplinary	positive	2017-11-20 19:38:35
932692929881235456	interdisciplinary	positive	2017-11-20 19:31:37
932692660128755712	interdisciplinary	neutral	2017-11-20 19:30:33
932690046049714179	interdisciplinary	positive	2017-11-20 19:20:10
932688871447547910	interdisciplinary	positive	2017-11-20 19:15:30
932686839802159104	interdisciplinary	neutral	2017-11-20 19:07:25
932686732591534080	interdisciplinary	positive	2017-11-20 19:07:00
932684841342132224	interdisciplinary	neutral	2017-11-20 18:59:29
932682913241591810	interdisciplinary	positive	2017-11-20 18:51:49
932682265620111360	interdisciplinary	neutral	2017-11-20 18:49:15
932677240382480384	interdisciplinary	neutral	2017-11-20 18:29:17
932673249481240576	interdisciplinary	positive	2017-11-20 18:13:25
932672680070967302	interdisciplinary	neutral	2017-11-20 18:11:09
932670461183447042	interdisciplinary	positive	2017-11-20 18:02:20
932665762539433985	interdisciplinary	neutral	2017-11-20 17:43:40
932664882335551488	interdisciplinary	neutral	2017-11-20 17:40:10
932656528519254017	interdisciplinary	neutral	2017-11-20 17:06:58
932655567465865218	interdisciplinary	neutral	2017-11-20 17:03:09
932655185977110528	interdisciplinary	neutral	2017-11-20 17:01:38
932654788411514880	interdisciplinary	positive	2017-11-20 17:00:04
932654158053855232	interdisciplinary	positive	2017-11-20 16:57:33
932654061039452160	interdisciplinary	positive	2017-11-20 16:57:10
932653539188510721	interdisciplinary	neutral	2017-11-20 16:55:06
932652574666260481	interdisciplinary	positive	2017-11-20 16:51:16
932651816264912896	interdisciplinary	neutral	2017-11-20 16:48:15
932651225744625665	interdisciplinary	neutral	2017-11-20 16:45:54
932651009364635648	interdisciplinary	positive	2017-11-20 16:45:03
932650664701911040	interdisciplinary	neutral	2017-11-20 16:43:40
932644445484408832	interdisciplinary	positive	2017-11-20 16:18:58
932643594028175361	interdisciplinary	neutral	2017-11-20 16:15:35
932642731775504384	interdisciplinary	positive	2017-11-20 16:12:09
932641947822551040	interdisciplinary	positive	2017-11-20 16:09:02
932641367100190720	interdisciplinary	positive	2017-11-20 16:06:44
932638099217309696	interdisciplinary	positive	2017-11-20 15:53:45
932635714172354560	interdisciplinary	neutral	2017-11-20 15:44:16
932634904579452928	interdisciplinary	neutral	2017-11-20 15:41:03
932634737637765120	interdisciplinary	neutral	2017-11-20 15:40:23
932633631465590785	interdisciplinary	neutral	2017-11-20 15:35:59
932632267280863232	interdisciplinary	neutral	2017-11-20 15:30:34
932629631471095810	interdisciplinary	positive	2017-11-20 15:20:06
932628844229603328	interdisciplinary	neutral	2017-11-20 15:16:58
932626919643742208	interdisciplinary	neutral	2017-11-20 15:09:19
932625668864659456	interdisciplinary	neutral	2017-11-20 15:04:21
932625089287163905	interdisciplinary	positive	2017-11-20 15:02:03
932623318158577665	interdisciplinary	neutral	2017-11-20 14:55:01
932623065271369728	interdisciplinary	neutral	2017-11-20 14:54:00
932622528727666689	interdisciplinary	positive	2017-11-20 14:51:52
932622311194181632	interdisciplinary	neutral	2017-11-20 14:51:00
932617508988837888	interdisciplinary	neutral	2017-11-20 14:31:55
932616693104480256	interdisciplinary	positive	2017-11-20 14:28:41
932616492020928513	interdisciplinary	positive	2017-11-20 14:27:53
932614878136885249	interdisciplinary	neutral	2017-11-20 14:21:28
932613514614792194	interdisciplinary	negative	2017-11-20 14:16:03
932609862315511808	interdisciplinary	neutral	2017-11-20 14:01:32
932609761052422145	interdisciplinary	positive	2017-11-20 14:01:08
932605563770490881	interdisciplinary	positive	2017-11-20 13:44:28
932604917788893184	interdisciplinary	neutral	2017-11-20 13:41:54
932603301618692097	interdisciplinary	neutral	2017-11-20 13:35:28
932601620508168194	interdisciplinary	positive	2017-11-20 13:28:47
932600256495341568	interdisciplinary	positive	2017-11-20 13:23:22
932599304153456646	interdisciplinary	neutral	2017-11-20 13:19:35
932597116156940288	interdisciplinary	neutral	2017-11-20 13:10:53
932594457584787456	interdisciplinary	neutral	2017-11-20 13:00:20
932592939796127745	interdisciplinary	neutral	2017-11-20 12:54:18
932591928721444864	interdisciplinary	positive	2017-11-20 12:50:17
932586189663633418	interdisciplinary	positive	2017-11-20 12:27:28
932579709547941889	interdisciplinary	neutral	2017-11-20 12:01:43
932578998743379968	interdisciplinary	neutral	2017-11-20 11:58:54
932574688399839232	interdisciplinary	neutral	2017-11-20 11:41:46
932572919288483842	interdisciplinary	neutral	2017-11-20 11:34:44
932568087790055424	interdisciplinary	neutral	2017-11-20 11:15:33
932564501664329728	interdisciplinary	neutral	2017-11-20 11:01:18
932560720516009985	interdisciplinary	positive	2017-11-20 10:46:16
932559048351911936	interdisciplinary	neutral	2017-11-20 10:39:37
932556747025338369	interdisciplinary	positive	2017-11-20 10:30:29
932555896936427521	interdisciplinary	positive	2017-11-20 10:27:06
932549491437330433	interdisciplinary	positive	2017-11-20 10:01:39
932549300944605184	interdisciplinary	neutral	2017-11-20 10:00:53
932545591099269120	interdisciplinary	positive	2017-11-20 09:46:09
956305147415728133	interdisciplinary	positive	2018-01-24 23:18:09
956301178425417728	interdisciplinary	negative	2018-01-24 23:02:22
956299845454782464	interdisciplinary	positive	2018-01-24 22:57:05
956299793088831488	interdisciplinary	neutral	2018-01-24 22:56:52
956298737512431617	interdisciplinary	neutral	2018-01-24 22:52:40
956296588489568256	interdisciplinary	neutral	2018-01-24 22:44:08
956296554947731456	interdisciplinary	neutral	2018-01-24 22:44:00
956292721798295552	interdisciplinary	neutral	2018-01-24 22:28:46
956288349974814720	interdisciplinary	positive	2018-01-24 22:11:24
956285737980387328	interdisciplinary	positive	2018-01-24 22:01:01
956282271820124160	interdisciplinary	neutral	2018-01-24 21:47:15
956282165087653888	interdisciplinary	positive	2018-01-24 21:46:49
956281865920569345	interdisciplinary	positive	2018-01-24 21:45:38
956281577616666624	interdisciplinary	neutral	2018-01-24 21:44:29
956279107565875200	interdisciplinary	positive	2018-01-24 21:34:40
956276334715658240	interdisciplinary	neutral	2018-01-24 21:23:39
956273658317737984	interdisciplinary	neutral	2018-01-24 21:13:01
956271953257615361	interdisciplinary	positive	2018-01-24 21:06:14
956271225881284610	interdisciplinary	positive	2018-01-24 21:03:21
956271082557857792	interdisciplinary	positive	2018-01-24 21:02:47
956269627599933440	interdisciplinary	neutral	2018-01-24 20:57:00
956269442211528704	interdisciplinary	positive	2018-01-24 20:56:16
956266808050372608	interdisciplinary	positive	2018-01-24 20:45:48
956265489554137089	interdisciplinary	neutral	2018-01-24 20:40:33
956263869965651969	interdisciplinary	positive	2018-01-24 20:34:07
956263703153963010	interdisciplinary	neutral	2018-01-24 20:33:28
956263367244697600	interdisciplinary	neutral	2018-01-24 20:32:07
956261725745045504	interdisciplinary	neutral	2018-01-24 20:25:36
956259869056753666	interdisciplinary	positive	2018-01-24 20:18:13
956258843666931715	interdisciplinary	positive	2018-01-24 20:14:09
956258603593293830	interdisciplinary	positive	2018-01-24 20:13:12
956258389075652608	interdisciplinary	neutral	2018-01-24 20:12:21
956254362774528001	interdisciplinary	neutral	2018-01-24 19:56:21
956251149522423813	interdisciplinary	positive	2018-01-24 19:43:34
956248784434089984	interdisciplinary	positive	2018-01-24 19:34:11
956247131702153217	interdisciplinary	positive	2018-01-24 19:27:37
956246679824474112	interdisciplinary	positive	2018-01-24 19:25:49
956246495388413955	interdisciplinary	positive	2018-01-24 19:25:05
956245606686654467	interdisciplinary	neutral	2018-01-24 19:21:33
956245251089453057	interdisciplinary	neutral	2018-01-24 19:20:08
956244899661320192	interdisciplinary	positive	2018-01-24 19:18:44
956243786409172992	interdisciplinary	neutral	2018-01-24 19:14:19
956242417157656580	interdisciplinary	neutral	2018-01-24 19:08:53
956241076871823360	interdisciplinary	positive	2018-01-24 19:03:33
956237707436609537	interdisciplinary	neutral	2018-01-24 18:50:10
956236389133242369	interdisciplinary	neutral	2018-01-24 18:44:55
956235540629803009	interdisciplinary	neutral	2018-01-24 18:41:33
956234137290985472	interdisciplinary	positive	2018-01-24 18:35:58
956233636877164552	interdisciplinary	positive	2018-01-24 18:33:59
956232665681793026	interdisciplinary	positive	2018-01-24 18:30:08
956231712941527040	interdisciplinary	neutral	2018-01-24 18:26:20
956230270105149441	interdisciplinary	positive	2018-01-24 18:20:36
956228445490511873	interdisciplinary	positive	2018-01-24 18:13:21
956227887316832256	interdisciplinary	negative	2018-01-24 18:11:08
956227318363578368	interdisciplinary	positive	2018-01-24 18:08:53
956226760097648645	interdisciplinary	positive	2018-01-24 18:06:40
956225336269856768	interdisciplinary	positive	2018-01-24 18:01:00
956225086930919425	interdisciplinary	neutral	2018-01-24 18:00:01
956224997936259073	interdisciplinary	positive	2018-01-24 17:59:39
956220776893435905	interdisciplinary	positive	2018-01-24 17:42:53
956219117278826497	interdisciplinary	neutral	2018-01-24 17:36:17
956217822631383040	interdisciplinary	neutral	2018-01-24 17:31:09
956217090448424961	interdisciplinary	positive	2018-01-24 17:28:14
956216706933952512	interdisciplinary	neutral	2018-01-24 17:26:43
956216441086373890	interdisciplinary	positive	2018-01-24 17:25:39
956214954629181440	interdisciplinary	positive	2018-01-24 17:19:45
956214257024208896	interdisciplinary	neutral	2018-01-24 17:16:59
956213324726833153	interdisciplinary	positive	2018-01-24 17:13:16
956213191532523520	interdisciplinary	positive	2018-01-24 17:12:45
956212332065157120	interdisciplinary	neutral	2018-01-24 17:09:20
956211998777278476	interdisciplinary	positive	2018-01-24 17:08:00
956211809467404290	interdisciplinary	neutral	2018-01-24 17:07:15
956207529457016832	interdisciplinary	neutral	2018-01-24 16:50:15
956206124402913285	interdisciplinary	positive	2018-01-24 16:44:40
956205760266031107	interdisciplinary	positive	2018-01-24 16:43:13
956205399795032065	interdisciplinary	neutral	2018-01-24 16:41:47
956203969956675590	interdisciplinary	positive	2018-01-24 16:36:06
956202366411436034	interdisciplinary	positive	2018-01-24 16:29:44
956200595840434176	interdisciplinary	positive	2018-01-24 16:22:42
956200409428905989	interdisciplinary	positive	2018-01-24 16:21:57
956198208706932737	interdisciplinary	neutral	2018-01-24 16:13:12
956196899723255808	interdisciplinary	neutral	2018-01-24 16:08:00
956196019678543872	interdisciplinary	positive	2018-01-24 16:04:31
956195194831015936	interdisciplinary	neutral	2018-01-24 16:01:14
956194897429581824	interdisciplinary	neutral	2018-01-24 16:00:03
956193681429712896	interdisciplinary	neutral	2018-01-24 15:55:13
956191827694059521	interdisciplinary	positive	2018-01-24 15:47:51
956187506717884417	interdisciplinary	neutral	2018-01-24 15:30:41
956187044102811648	interdisciplinary	positive	2018-01-24 15:28:51
956186545190592512	interdisciplinary	neutral	2018-01-24 15:26:52
956184772929359872	interdisciplinary	negative	2018-01-24 15:19:49
956182788859981825	interdisciplinary	positive	2018-01-24 15:11:56
956181927828090881	interdisciplinary	positive	2018-01-24 15:08:31
956180139641135104	interdisciplinary	neutral	2018-01-24 15:01:24
956179205108195328	interdisciplinary	neutral	2018-01-24 14:57:42
956178388288462850	interdisciplinary	neutral	2018-01-24 14:54:27
956177832803291136	interdisciplinary	positive	2018-01-24 14:52:14
956177650761990144	interdisciplinary	positive	2018-01-24 14:51:31
956176208424783873	interdisciplinary	neutral	2018-01-24 14:45:47
956176096126554113	interdisciplinary	positive	2018-01-24 14:45:20
956175758409388034	interdisciplinary	neutral	2018-01-24 14:44:00
956173057567133701	interdisciplinary	positive	2018-01-24 14:33:16
956170258221449223	interdisciplinary	neutral	2018-01-24 14:22:09
956170000380940288	interdisciplinary	positive	2018-01-24 14:21:07
956168747429048320	interdisciplinary	neutral	2018-01-24 14:16:08
956167859025006593	interdisciplinary	positive	2018-01-24 14:12:36
956167396103983107	interdisciplinary	neutral	2018-01-24 14:10:46
956166265982382080	interdisciplinary	neutral	2018-01-24 14:06:17
956165655325265921	interdisciplinary	neutral	2018-01-24 14:03:51
956164780334739457	interdisciplinary	positive	2018-01-24 14:00:22
956163469488902144	interdisciplinary	positive	2018-01-24 13:55:10
956163090625724416	interdisciplinary	neutral	2018-01-24 13:53:40
956159699770134528	interdisciplinary	positive	2018-01-24 13:40:11
956157508535705600	interdisciplinary	neutral	2018-01-24 13:31:29
956157185054199809	interdisciplinary	neutral	2018-01-24 13:30:12
956154754849271808	interdisciplinary	positive	2018-01-24 13:20:32
956154213263925250	interdisciplinary	neutral	2018-01-24 13:18:23
956152551849844736	interdisciplinary	neutral	2018-01-24 13:11:47
956152458203533312	interdisciplinary	negative	2018-01-24 13:11:25
956151420134330369	interdisciplinary	positive	2018-01-24 13:07:17
956151329403166721	interdisciplinary	neutral	2018-01-24 13:06:56
956150326394048512	interdisciplinary	negative	2018-01-24 13:02:56
956147515446956034	interdisciplinary	positive	2018-01-24 12:51:46
956147205693427713	interdisciplinary	neutral	2018-01-24 12:50:32
956145309532545024	interdisciplinary	positive	2018-01-24 12:43:00
956143867451117569	interdisciplinary	positive	2018-01-24 12:37:16
956143327941988352	interdisciplinary	positive	2018-01-24 12:35:08
956143325412839424	interdisciplinary	neutral	2018-01-24 12:35:07
956142119328108549	interdisciplinary	neutral	2018-01-24 12:30:20
956137020551778305	interdisciplinary	positive	2018-01-24 12:10:04
956135907740061697	interdisciplinary	neutral	2018-01-24 12:05:39
956134625931227139	interdisciplinary	positive	2018-01-24 12:00:33
956134315980664833	interdisciplinary	positive	2018-01-24 11:59:19
956132184447946753	interdisciplinary	negative	2018-01-24 11:50:51
956131378583822336	interdisciplinary	neutral	2018-01-24 11:47:39
956131076707151873	interdisciplinary	positive	2018-01-24 11:46:27
956130418667016192	interdisciplinary	neutral	2018-01-24 11:43:50
956128230653743104	interdisciplinary	positive	2018-01-24 11:35:08
956127029547667456	interdisciplinary	neutral	2018-01-24 11:30:22
956124043727593472	interdisciplinary	positive	2018-01-24 11:18:30
956123133425090560	interdisciplinary	neutral	2018-01-24 11:14:53
956121434908168192	interdisciplinary	positive	2018-01-24 11:08:08
956120816697065473	interdisciplinary	positive	2018-01-24 11:05:41
956119666635804672	interdisciplinary	positive	2018-01-24 11:01:07
956118933735706624	interdisciplinary	neutral	2018-01-24 10:58:12
956118029288423424	interdisciplinary	positive	2018-01-24 10:54:36
956117428928475136	interdisciplinary	positive	2018-01-24 10:52:13
956117014518509569	interdisciplinary	positive	2018-01-24 10:50:34
956112362049867776	interdisciplinary	neutral	2018-01-24 10:32:05
956109830388895744	interdisciplinary	positive	2018-01-24 10:22:01
956106184074891264	interdisciplinary	neutral	2018-01-24 10:07:32
956105560729976832	interdisciplinary	positive	2018-01-24 10:05:03
956105054817275904	interdisciplinary	positive	2018-01-24 10:03:03
956104984608862208	interdisciplinary	positive	2018-01-24 10:02:46
956102499450146817	interdisciplinary	neutral	2018-01-24 09:52:54
956101945894240256	interdisciplinary	neutral	2018-01-24 09:50:42
956098731673309184	interdisciplinary	positive	2018-01-24 09:37:55
956098465066618880	interdisciplinary	positive	2018-01-24 09:36:52
956098064351203329	interdisciplinary	neutral	2018-01-24 09:35:16
956097700650463233	interdisciplinary	neutral	2018-01-24 09:33:49
956095993363226624	interdisciplinary	positive	2018-01-24 09:27:02
956095852589780997	interdisciplinary	neutral	2018-01-24 09:26:29
956095128724213760	interdisciplinary	positive	2018-01-24 09:23:36
956094704780636160	interdisciplinary	positive	2018-01-24 09:21:55
956094291255808000	interdisciplinary	neutral	2018-01-24 09:20:17
956092975154524161	interdisciplinary	positive	2018-01-24 09:15:03
956092446710157313	interdisciplinary	neutral	2018-01-24 09:12:57
956092248705388544	interdisciplinary	neutral	2018-01-24 09:12:10
956091663654453250	interdisciplinary	neutral	2018-01-24 09:09:50
956089624010600448	interdisciplinary	positive	2018-01-24 09:01:44
956089360428003328	interdisciplinary	positive	2018-01-24 09:00:41
956089235408384000	interdisciplinary	positive	2018-01-24 09:00:11
956087627773566976	interdisciplinary	neutral	2018-01-24 08:53:48
956083602072244224	interdisciplinary	positive	2018-01-24 08:37:48
956081340520087552	interdisciplinary	positive	2018-01-24 08:28:49
956075892920455169	interdisciplinary	neutral	2018-01-24 08:07:10
956073713434349568	interdisciplinary	positive	2018-01-24 07:58:30
956070614216921088	interdisciplinary	neutral	2018-01-24 07:46:12
956069456312233985	interdisciplinary	positive	2018-01-24 07:41:35
956069423743492098	interdisciplinary	positive	2018-01-24 07:41:28
956066544123109376	interdisciplinary	positive	2018-01-24 07:30:01
[truncated: 64,783 more rows]
